# Supplementary material for: Adaptation of potentially preventable medication-related hospitalisation indicators for Indigenous populations in Australia using a modified Delphi technique
Source: PubMed Central journal article supplement — BMJ Open. 2019 Nov 19;9(11):e031369. doi: 10.1136/bmjopen-2019-031369 (PMC6887044; doi:10.1136/bmjopen-2019-031369), 2019-11-19
Supplement: bmjopen-2019-031369.draft_revisions.pdf [file bmjopen-2019-031369.draft_revisions.pdf]

# BMJ Open

BMJ Open is committed to open peer review. As part of this commitment we make the peer review history of every article we publish publicly available.

When an article is published we post the peer reviewers' comments and the authors' responses online. We also post the versions of the paper that were used during peer review. These are the versions that the peer review comments apply to.

The versions of the paper that follow are the versions that were submitted during the peer review process. They are not the versions of record or the final published versions. They should not be cited or distributed as the published version of this manuscript.

BMJ Open is an open access journal and the full, final, typeset and author-corrected version of record of the manuscript is available on our site with no access controls, subscription charges or pay-per-view fees (<http://bmjopen.bmj.com>).

If you have any questions on BMJ Open's open peer review process please email [info.bmjopen@bmj.com](mailto:info.bmjopen@bmj.com)

# BMJ Open

## Adaptation of potentially preventable medication-related hospitalisation indicators for Indigenous populations in Australia using a modified Delphi technique

|                               |                                                                                                                                                                                                                                                                                                                                                                                                                                                                                                                                                                                                                                                                                                                             |
|-------------------------------|-----------------------------------------------------------------------------------------------------------------------------------------------------------------------------------------------------------------------------------------------------------------------------------------------------------------------------------------------------------------------------------------------------------------------------------------------------------------------------------------------------------------------------------------------------------------------------------------------------------------------------------------------------------------------------------------------------------------------------|
| Journal:                      | <i>BMJ Open</i>                                                                                                                                                                                                                                                                                                                                                                                                                                                                                                                                                                                                                                                                                                             |
| Manuscript ID                 | bmjopen-2019-031369                                                                                                                                                                                                                                                                                                                                                                                                                                                                                                                                                                                                                                                                                                         |
| Article Type:                 | Research                                                                                                                                                                                                                                                                                                                                                                                                                                                                                                                                                                                                                                                                                                                    |
| Date Submitted by the Author: | 30-Apr-2019                                                                                                                                                                                                                                                                                                                                                                                                                                                                                                                                                                                                                                                                                                                 |
| Complete List of Authors:     | Spinks, Jean; Griffith University, Centre for Applied Health Economics, Menzies Institute for Health Queensland<br>Kalisch Ellett, Lisa; University of South Australia, Sansom Institute for Health Research, School of Pharmacy and Medical Sciences, Quality Use of Medicines and Pharmacy Research Centre<br>Spurling, Geoffrey ; University of Queensland, Primary Care Clinical Unit<br>Theodoros, Theo; Metro South, Addiction and Mental Health Services<br>Williamson, Daniel; Queensland Health , Aboriginal and Torres Strait Islander Health Branch<br>Wheeler, Amanda; Griffith Health Institute, Griffith University, Menzies Health Institute; University of Auckland, Faculty of Health and Medical Sciences |
| Keywords:                     | Indigenous health, potentially preventable medication-related hospitalisations, medication review, clinical indicators                                                                                                                                                                                                                                                                                                                                                                                                                                                                                                                                                                                                      |
|                               |                                                                                                                                                                                                                                                                                                                                                                                                                                                                                                                                                                                                                                                                                                                             |

SCHOLARONE™  
Manuscripts

1  
2  
3 **Adaptation of potentially preventable medication-related hospitalisation indicators for**  
4  
5 **Indigenous populations in Australia using a modified Delphi technique**  
6  
7

8 Jean Spinks<sup>1</sup>, Lisa Kalisch Ellet<sup>2</sup>, Geoffrey Spurling<sup>3</sup>, Theo Theodoros<sup>4,5</sup>, Daniel  
9 Williamson<sup>6</sup>, Amanda J Wheeler<sup>7,8</sup>  
10

11  
12  
13  
14 <sup>1</sup> Centre for Applied Health Economics, Menzies Health Institute Queensland, Griffith  
15 University, Kessels Road, Nathan, Qld 4111  
16

17  
18  
19 Corresponding author: Jean Spinks  
20

21  
22 [j.spinks@griffith.edu.au](mailto:j.spinks@griffith.edu.au) Ph: +61 7 37359101  
23  
24

25 <sup>2</sup> Quality Use of Medicines and Pharmacy Research Centre, University of South Australia,  
26 GPO Box 2471, Adelaide, SA 5001  
27  
28

29  
30 <sup>3</sup> Primary Care Clinical Unit, The University of Queensland, Royal Brisbane and Women's  
31 Hospital, Health Sciences Building, Herston, Qld, 4005.  
32  
33

34  
35 <sup>4</sup> Metro South Addiction and Mental Health Services, Brisbane, QLD, Australia  
36

37  
38 <sup>5</sup> University of Queensland, Brisbane, QLD, Australia  
39

40  
41 <sup>6</sup> Aboriginal and Torres Strait Islander Health Branch, Queensland Health  
42

43  
44 <sup>7</sup> Menzies Health Institute Queensland, Griffith University, Brisbane, Queensland, Australia  
45

46  
47 <sup>8</sup> Faculty of Medical and Health Sciences, Auckland University, Auckland, New Zealand.  
48

49 ORCID ID: <https://orcid.org/0000-0001-9755-6746>  
50

51  
52  
53  
54 Word count: 2,774  
55  
56  
57  
58  
59  
60

## Abstract

**Objectives:** One of the outcomes of a medication review service is to identify and manage medication-related problems (MRPs). The most serious MRPs may result in hospitalisation, which could be preventable if appropriate processes of care were adopted. The aim of this study was to update and adapt a previously published set of clinical indicators so that the revised indicators can be used to assess the effectiveness of a medication review service tailored to meet the needs of Indigenous<sup>1</sup> people, who experience some of the worst health outcomes of all Australians.

**Design:** A modified Delphi technique was used to: (i) identify additional indicators for consideration; (ii) assess whether the original indicators were relevant in the context of Indigenous health; and (iii) reach consensus on a final set of indicators. Three rounds of rating were used via an anonymous online survey, with 70% agreement required for indicator inclusion.

**Participants:** Thirteen panellists participated including medical specialists, general practice doctors, pharmacists and epidemiologists experienced in working with Indigenous patients.

**Results:** Panellists rated 102 indicators (45 from the original set and 57 newly identified). Of these, 41 were accepted unchanged, 7 were rejected and the remainder were either modified before acceptance or merged with other indicators. A final set of 81 indicators was agreed.

**Conclusions:** This study provides a set of clinical indicators to be used as a primary outcome measure for medication review services for Indigenous people in Australia. Rates of the cumulative incidence of these indicators should be identified using administrative databases

---

<sup>1</sup> Please note that the use of the term 'Indigenous' in this manuscript includes all Aboriginal and Torres Strait Islander people and acknowledges their rich traditions and heterogeneous cultures.

1  
2  
3 to identify population rates of suboptimal care prior to hospital admission and as a prompt for  
4  
5 pharmacists and doctors conducting medication reviews.  
6  
7

## 8 **Article Summary**

9

### 10 **Strengths and limitations of the study:**

11

- 12  
13  
14 ➤ This is the first set of clinical indicators developed to identify potentially preventable  
15 medication-related hospitalisations (PPMRHs) in Indigenous Australians;  
16  
17 ➤ The set of clinical indicators developed can be used to measure serious medication-  
18 related problems (MRPs) in Indigenous Australians and be used as a resource by  
19 health professionals conducting medication review services;  
20  
21 ➤ The set of clinical indicators forms the primary outcome measure of an Indigenous  
22 Medication Review Service (IMeRSe) feasibility study;  
23  
24 ➤ The participant sample size for this study was limited, possibly due to workload  
25 constraints of clinicians working in Indigenous health in Australia;  
26  
27 ➤ This study makes an important contribution to the literature by developing a  
28 quantitative measure that can be used to improve medication outcomes for Indigenous  
29 Australians.  
30  
31  
32  
33  
34  
35  
36  
37  
38  
39  
40  
41

42 **Keywords:** Indigenous health; potentially preventable medication-related hospitalisations;  
43 medication review; clinical indicators  
44  
45  
46

47 **Trial registration:** The trial registration for the IMeRSe feasibility study is  
48  
49 ACTRN12618000188235.  
50  
51  
52

53 **Funding Statement:** This activity received grant funding from the Australian Government.  
54  
55

56 **Competing interests statement:** None declared.  
57  
58  
59  
60

1  
2  
3 **Author contributions:** JS was responsible for study concept, design, data collection and  
4 wrote the first draft of the manuscript. AJW designed the research protocol, is the principle  
5 investigator and was involved in the design and data collection. All authors were involved in  
6 the revision of this paper and made a contribution to the intellectual content and approved the  
7 final version of the paper.  
8  
9

10  
11  
12  
13  
14  
15 **Acknowledgements:** The Indigenous Medication Review Service (IMeRSe) feasibility study  
16 has been developed in partnership with The Pharmacy Guild of Australia, the National  
17 Aboriginal Community Controlled Health Organisation (NACCHO) and Griffith University.  
18 The authors would like to acknowledge the time and experience of the panellists who  
19 participated in this study and Dr Helen Stapleton for providing feedback on the manuscript.  
20 This activity received grant funding from the Australian Government. The researchers were  
21 independent from the funder. This article contains the opinions of the authors and does not in  
22 any way reflect the views of the Department of Health or the Australian Government. The  
23 financial assistance provided must not be taken as endorsement of the contents of this article.  
24  
25  
26  
27  
28  
29  
30  
31  
32  
33  
34  
35  
36  
37  
38  
39  
40  
41  
42  
43  
44  
45  
46  
47  
48  
49  
50  
51  
52  
53  
54  
55  
56  
57  
58  
59  
60

## Introduction

Aboriginal and Torres Strait Islander people in Australia experience higher rates of disease burden compared with other Australians, particularly for chronic disease.[1] As pharmacotherapy is one of the principal tools used to manage chronic conditions, this creates a challenge for health services providers to coordinate medication services within a culturally respectful and comprehensive primary health care system,[2] and minimise medication related harm. Medication review is a structured evaluation of an individual's medications to optimise medication use and health outcomes.[3] An important component of a medication review involves a pharmacist identifying medication related problems (MRPs) and, in consultation with the prescriber, suggesting management options.

Medication reviews have been shown to significantly increase the identification and resolution of MRPs, although there is limited evidence to show that they reduce hospital admissions,[4] possibly because there are many types of MRPs with varying degrees of severity and preventability.[5-7] Although the most serious MRPs can lead to hospitalisation[8] some are unpredictable and therefore not considered preventable, for example, atypical adverse drug reactions. However other MRPs are potentially preventable, for example, where clinical care preceding the hospitalisation event is not in accordance with accepted clinical guidelines.

Potentially preventable medication-related hospitalisations (PPMRHs) are the result of a proportion of serious MRPs.[8] There are a number of advantages of using PPMRHs as the primary outcome in a medication review intervention as they: (i) are pre-specified, removing potential classification bias from the primary outcome; (ii) can be costed, for easy inclusion in an economic evaluation; and (iii) offer a meaningful target for pharmacists and other clinicians undertaking medication reviews in clinical settings.

1  
2  
3 The Indigenous Medication Review Service (IMeRSe) feasibility study is being undertaken  
4 across nine Australian sites including remote, regional and urban locations, with the aim of  
5 developing and testing the feasibility of a culturally appropriate, strengths-based, medication  
6 review service.[9] The IMeRSe intervention is delivered by local community pharmacists (on  
7 a fee-for-service basis) integrated with local Aboriginal health services (AHSs).  
8  
9

10  
11 Here we report on the modification of an existing set of 45 PPMRH indicators which were  
12 originally developed and validated for use in the Australian healthcare setting.[10, 11] The  
13 indicators needed to be revised, however, to ensure: (i) utility, as an appropriate primary  
14 outcome measure in the IMeRSe feasibility study; and (ii) currency and applicability, in light  
15 of changes to clinical guidelines and best practice.  
16  
17  
18  
19  
20  
21  
22  
23  
24  
25  
26  
27  
28  
29

## 30 **Methods**

31  
32 In general terms, the selection of clinical indicators to measure processes and outcomes of  
33 primary care should meet the criteria of validity, reproducibility, acceptability, feasibility,  
34 reliability, sensitivity, and predictive validity.[12] Consensus methods are one way of  
35 developing, or refining, a set of clinical indicators to meet these criteria. The Delphi  
36 technique has been widely used in health research to achieve consensus on a particular topic  
37 where expert opinion is the main source of evidence,[13, 14] including the development of  
38 healthcare quality indicators.[15] Other consensus methods, such as the nominal group  
39 technique,[16] or the RAND appropriateness method,[17-20] may also be appropriate,  
40 however, the Delphi technique has the advantage of involving a sufficiently representative  
41 group of experts whilst being less resource intensive than alternative methods.  
42  
43  
44  
45  
46  
47  
48  
49  
50  
51  
52  
53  
54  
55  
56

### 57 *Selection of Delphi panellists*

58  
59  
60



1  
2  
3 The IMeRSe feasibility study Expert Stakeholder Panel (which included Indigenous advisors)  
4 identified potential panellists for the Clinical Validation Group (CVG).[9] The function of the  
5  
6 Expert Stakeholder Panel is to ensure that all aspects of the study are culturally appropriate  
7  
8 and respect Indigenous practices, protocols and community engagement. Potential CVG  
9  
10 panellists were identified by the Expert Stakeholder Panel as either having current clinical  
11  
12 experience as a doctor or a pharmacist in an Indigenous health setting, or medication safety  
13  
14 expertise from a public health perspective. Potential panellists were approached via email,  
15  
16 provided with participant information forms and instructions, and contact details to obtain  
17  
18 further information, as required. Panellists were made aware that informed consent was  
19  
20 implied by acceptance of the invitation via return email. Of the 40 eligible panellists  
21  
22 approached to participate, 13 agreed. Panellists were offered a small honorarium to  
23  
24 compensate them for their time. Ethics approval was granted from Griffith University Human  
25  
26 Research Ethics Committee (GU ref No:2018/126) for this study.  
27  
28  
29  
30  
31  
32

### 33 *Rating rounds*

34  
35  
36 Prior to the start of the first rating round, consented panellists were interviewed individually  
37  
38 by a member the research team (JS) to ensure they had a chance to clarify the Delphi process.  
39  
40 During the interview, panellists were asked to identify any additional indicators that they  
41  
42 believed should be considered in addition to the original 45 indicators[11] or email them after  
43  
44 the interview, if preferred. Panellists were asked to only identify indicators that met the  
45  
46 criteria of preventable drug-related morbidity, as defined by Hepler & Strand[21] who  
47  
48 specify three necessary elements:  
49  
50  
51

- 52  
53 1. The drug-related problem must be recognisable, and the likelihood of an undesirable  
54  
55 clinical outcome must be foreseeable;
- 56  
57 2. The causes of that outcome must be identifiable;
- 58  
59  
60

1  
2  
3 3. The causes must be controllable.  
4  
5

6 Panellists were also asked to consider indicators that, from their own clinical experience,  
7 represented the greatest burden to population health for Indigenous Australians. Additional  
8 indicators considered to be relevant were added to the original list of 45 indicators to form a  
9 Master List. Three rounds of rating and consensus were then undertaken using this list as a  
10 starting point.  
11  
12  
13  
14  
15  
16

17  
18 The first two rating rounds were sent to all panellists via email link in an online format hosted  
19 in LimeSurvey.[22] Panellists were asked to carefully consider each indicator presented and  
20 then choose from four options: (i) accept indicator unchanged; (ii) reject indicator; (iii)  
21 specify alternative; or (iv) not sure. Panellists were asked to provide comments or a rationale  
22 for rejecting an indicator or providing an alternative. An example of the online presentation  
23 of a clinical indicator to panellists is shown in Figure 1.  
24  
25  
26  
27  
28  
29  
30  
31

32  
33 << Figure 1 about here >>  
34  
35

36 The indicator was accepted unchanged if at least 70% of panellists chose the option “Accept  
37 indicator unchanged” or rejected if at least 70% of panellists chose the option “Reject  
38 indicator” in accordance with previous modified Delphi methods.[23] The indicators which  
39 were accepted unchanged or rejected were removed and did not appear in subsequent rating  
40 rounds. All other indicators (where an alternative was proposed) were collated alongside the  
41 panellists’ comments or rationale, by the researchers. The researchers considered the  
42 comments, consulted any relevant clinical literature and offered alternative wording for the  
43 disputed indicator. Panellists’ comments were (anonymously) reported *verbatim* in the  
44 subsequent rating round, alongside the researchers proposed new wording of the indicator  
45 and links to any relevant clinical literature or guidelines. Researchers set a deadline of two  
46 weeks for responses after the online survey was opened. Panellists could login to the survey  
47  
48  
49  
50  
51  
52  
53  
54  
55  
56  
57  
58  
59  
60

again if they had not completed it, and previous responses could be altered at any time prior to survey submission. Reminder emails were sent one week before the deadline and requests for additional time was granted for participants to complete the rating round, if required.

Every effort was made by the research team to enable all 13 participants to complete the first two rating rounds.

The third rating round involved a face-to-face meeting of an invited sub-group (n=3) of the larger consensus group; a representative from each main speciality area (specialist doctor, general practice doctor, clinical pharmacist) provided expert commentary regarding any remaining discrepancies. Consensus in this final round was achieved following open group discussion which was moderated by the researchers (JS/AW).

## Results

### *CVG panellists*

A total of 13 panellists, five females and eight males, from five clinical areas participated between May and November 2018. They had a mean of 17 years experience in their clinical areas and 11 years experience working with Indigenous people in their current role (Table 1). Panellists were drawn from six of the nine states and territories across Australia from and from urban, rural and remote locations (detailed information is withheld to maintain the anonymity of panellists).

**Table 1: Clinical Validation Group (CVG) Panel**

| Clinical expertise   | Number | %  |
|----------------------|--------|----|
| Pharmacist           | 5      | 39 |
| Specialist doctor    | 3      | 23 |
| General practitioner | 2      | 15 |
| Researcher           | 2      | 15 |
| Epidemiologist       | 1      | 8  |

### *Clinical indicators*

In addition to the original 45 indicators,[11] panellists identified a further 56 new indicators. Hence, the Master List of indicators at the start of Round 1 rating comprised 102 indicators. During each of the rating rounds, panellists made suggestions to split and merge indicators, meaning the number of indicators for consideration could increase or decrease between rounds. The number of clinical indicators from the Master List accepted or rejected in each rating round, grouped by clinical presentation, are summarised in Table 2.

**Table 2: Clinical indicators by clinical presentation and round**

| Clinical Presentation                     | Master List | Accepted Round 1 | Accepted Round 2 | Accepted Round 3 | Rejected       |
|-------------------------------------------|-------------|------------------|------------------|------------------|----------------|
| Neurological                              | 17          | 7                | 11               | 14               | 0              |
| Vaccine preventable diseases              | 12          | 11               | 11               | 12               | 0              |
| Electrolytes and laboratory abnormalities | 15          | 4                | 7                | 10               | 1 <sup>†</sup> |
| Cardiovascular                            | 12          | 1                | 6                | 9                | 0              |
| Respiratory                               | 6           | 4                | 5                | 6                | 0              |
| Renal                                     | 5           | 1                | 3                | 5                | 0              |
| Fracture or falls                         | 6           | 3                | 3                | 4                | 0              |
| Haemorrhagic event                        | 5           | 1                | 2                | 3                | 0              |
| Gastrointestinal                          | 4           | 0                | 3                | 3                | 0              |
| Endocrine                                 | 6           | 3                | 3                | 3                | 0              |
| Genitourinary                             | 3           | 1                | 2                | 2                | 0              |
| Sexually transmitted infections (STIs)    | 1           | 0                | 1                | 1                | 0              |
| Other                                     | 10          | 5                | 8                | 9                | 0              |
| <b>Total*</b>                             | <b>102</b>  | <b>41</b>        | <b>65</b>        | <b>81</b>        | <b>1</b>       |

\*NOTE: Totals are not cumulative as during the rating process, panellists suggested that some indicators should be merged or split.

At the end of Round 2 rating, 65 indicators (80% of the final total) were agreed upon by the panellists. The three-person sub-group of the CVG invited to undertake Round 3 rating formed consensus on the remaining 23 indicators during a two-hour face-to-face meeting (one panellist phoned-in), moderated by the research team (JS/AW). One clinical indicator was rejected during this round, with the remaining 22 indicators either accepted or merged with other indicators.

1  
2  
3 The final list of accepted indicators is presented in Table 3<sup>2</sup>. Thirty-four indicators from the  
4 original list of 45 were accepted by panellists, although 21 of these were updated in some  
5 way to reflect: (i) changes in current guidelines or new medicines; (ii) having been combined  
6 with other similar indicators for simplification; (iii) having been split into additional  
7 indicators for clarity. Forty-seven new indicators were added, giving a final total of 81  
8 indicators.  
9  
10  
11  
12  
13  
14  
15  
16  
17  
18  
19  
20  
21  
22  
23  
24  
25  
26  
27  
28  
29  
30  
31  
32  
33  
34  
35  
36  
37  
38  
39  
40  
41  
42  
43  
44  
45  
46  
47  
48  
49  
50  
51  
52  
53  
54  
55  
56  
57  
58

---

59 <sup>2</sup> NB. The final list of clinical indicators has not been considered as part of any independent Health Technology  
60 Assessment (HTA) for effectiveness/cost-effectiveness.

**Table 3: Final list of potentially preventable medication-related hospitalisations (PPMRHs) for Indigenous Australians<sup>#</sup>**

| Number                    | Hospitalisation outcome to avoid                | Process of sub-optimal clinical care prior to hospitalisation                                                                                                                                                                                                                                                                                                          |
|---------------------------|-------------------------------------------------|------------------------------------------------------------------------------------------------------------------------------------------------------------------------------------------------------------------------------------------------------------------------------------------------------------------------------------------------------------------------|
| <b>Haemorrhagic event</b> |                                                 |                                                                                                                                                                                                                                                                                                                                                                        |
| 1                         | Haemorrhagic event                              | Use of warfarin;<br>Concurrent use of an interacting antibiotic;<br>No INR test in the 5 days prior to admission.                                                                                                                                                                                                                                                      |
| 2                         | Haemorrhagic event                              | Use of warfarin;<br>No INR test in the 6 weeks prior to admission.                                                                                                                                                                                                                                                                                                     |
| 3                         | Haemorrhagic event                              | Use of one or more antithrombotics (warfarin, DOAC, aspirin, NSAID, clopidogrel, LMWH);<br>AND<br>No haemoglobin test within the past year; OR<br>No monitoring of renal function in the previous 6 months; OR<br>Use of triple therapy (dual antiplatelet plus oral anticoagulant) for more than one month prior to admission.                                        |
| <b>Gastrointestinal</b>   |                                                 |                                                                                                                                                                                                                                                                                                                                                                        |
| 4                         | Gastritis, GI bleed, GI ulcer or GI perforation | History of or prior hospitalisation for GI ulcers or GI bleed;<br>Use of NSAID (including aspirin) for a period of at least 1 month prior to admission.                                                                                                                                                                                                                |
| 5                         | Gastritis, GI bleed, GI ulcer or GI perforation | History of prior hospitalisation for GI ulcers or GI bleed; AND<br>Use of gastric toxin (e.g. oral corticosteroids, NSAIDs, antiplatelet agents, bisphosphonates, anticoagulants, cholinesterase inhibitor) for a period of at least 3 months prior to admission;<br>AND<br>No cytoprotection (e.g. proton pump inhibitor).                                            |
| 6                         | Bowel impaction                                 | Use of two or more medications known to retard gastrointestinal motility (including anticholinergic agents, calcium channel blockers, antacids, and iron preparations) at the time of admission; OR<br>Use of a highly anticholinergic agent at the time of admission; OR<br>Use of an opioid analgesic without concurrent use of a laxative at the time of admission. |
| <b>Cardiovascular</b>     |                                                 |                                                                                                                                                                                                                                                                                                                                                                        |
| 7                         | Congestive heart failure or fluid overload      | Prior hospitalisation for/or diagnosis of high blood pressure or CHF;<br>Use of an agent known to exacerbate CHF including NSAIDs, COX-2 inhibitors, anti-arrhythmics (apart from beta-blockers or amiodarone), non-dihydropyridine calcium-channel blockers in systolic CHF (verapamil, diltiazem), corticosteroids, clozapine, tricyclic anti-                       |

|                                                  |                                                                  |                                                                                                                                                                                                                            |
|--------------------------------------------------|------------------------------------------------------------------|----------------------------------------------------------------------------------------------------------------------------------------------------------------------------------------------------------------------------|
|                                                  |                                                                  | depressants, tyrosine kinase inhibitors, thiazolidinediones or tumour necrosis factor antagonists at time of admission.                                                                                                    |
| 8                                                | Congestive heart failure or fluid overload                       | Prior hospitalisation for/ or diagnosis of heart failure;<br>No use of ACEI, ARB or ARNi (angiotensin receptor neprilysin inhibitor) at time of admission.                                                                 |
| 9                                                | Myocardial Infarction                                            | History of acute coronary syndrome / previous MI;<br>No use of anti-platelet(s) OR beta-blocker (reduced left-ventricular systolic function only) OR HMG-CoA reductase inhibitor in the 3 months prior to hospitalisation. |
| 10                                               | Myocardial infarction                                            | Insertion of stent within the previous 12 months;<br>No use of dual anti-platelet in 2 months prior to admission.                                                                                                          |
| 11                                               | Thromboembolic cerebrovascular event                             | Prior diagnosis of atrial fibrillation;<br>No use of anticoagulant in the 3 months prior to admission in a patient with high risk according to CHA2Ds2Vasc score.                                                          |
| 12                                               | Acute coronary syndrome                                          | CVD risk known to be >15% prior to admission;<br>Not on lipid lowering therapy AND/OR antihypertensive therapy.                                                                                                            |
| 13                                               | Transient ischaemic attack (TIA)/ Ischaemic stroke               | Pulse quality/blood pressure not tested within past 24 months;<br>No use of any of antiplatelet, antihypertensive, anticoagulant, lipid lowering therapy.                                                                  |
| 14                                               | Ischaemic coronary event                                         | History of angina or acute coronary syndrome;<br>No use of beta-blocker, calcium channel blocker or nitrates.                                                                                                              |
| 15                                               | Ischaemic event                                                  | History of diabetes;<br>History of ischaemic event;<br>No antiplatelet or lipid lowering therapy.                                                                                                                          |
| <b>Electrolytes and laboratory abnormalities</b> |                                                                  |                                                                                                                                                                                                                            |
| 16                                               | Blood dyscrasia                                                  | Use of an agent known to cause blood dyscrasias (including carbimazole, sulphonylureas, propylthiouracil, methotrexate, sulphasalazine);<br>No complete blood count or platelet test in the 6 months prior to admission.   |
| 17                                               | Syndrome of inappropriate antidiuretic hormone secretion (SIADH) | Use of TCAs, carbamazepine, ACEIs, other antidepressants;<br>No electrolyte test in the 12 months prior to admission.                                                                                                      |
| 18                                               | Electrolyte imbalance                                            | Use of diuretics, ACEI/ARB, spironolactone, potassium supplements or calcium supplements;<br>No electrolyte test in the 12 months prior to admission; AND<br>No renal function test in the 12 months prior to admission.   |
| 19                                               | Anticonvulsant drug toxicity                                     | Use of anticonvulsant requiring therapeutic drug monitoring;                                                                                                                                                               |

|                          |                                                   |                                                                                                                                                             |
|--------------------------|---------------------------------------------------|-------------------------------------------------------------------------------------------------------------------------------------------------------------|
|                          |                                                   | No drug level test in the 6 months prior to admission.                                                                                                      |
| 20                       | Digoxin toxicity                                  | Use of digoxin;                                                                                                                                             |
|                          |                                                   | No renal function test in the 12 months prior to admission; AND                                                                                             |
|                          |                                                   | No potassium serum level in the 6 months prior to admission.                                                                                                |
| 21                       | Lithium toxicity                                  | Use of lithium;                                                                                                                                             |
|                          |                                                   | No lithium drug level test in the 3 months prior to admission.                                                                                              |
| 22                       | Clozapine-related blood dyscrasias                | Use of clozapine;                                                                                                                                           |
|                          |                                                   | No full blood count/white blood count/neutrophils/ eosinophils in >1 month prior to admission or within the previous week in the first 18 weeks of therapy. |
| 23                       | Clozapine-induced myocarditis/cardiomyopathy      | Use of clozapine;                                                                                                                                           |
|                          |                                                   | No baseline echocardiogram; OR                                                                                                                              |
|                          |                                                   | ECG in the previous 12 months; OR                                                                                                                           |
|                          |                                                   | troponin in the previous 12 months; OR                                                                                                                      |
|                          |                                                   | CRP (C-reactive protein) in previous 12months before admission.                                                                                             |
| 24                       | Clozapine toxicity/failure                        | Use of clozapine;                                                                                                                                           |
|                          |                                                   | Altered smoking status whilst on clozapine (may vary levels and result in toxicity or relapse).                                                             |
| 25                       | Clozapine toxicity                                | Use of clozapine;                                                                                                                                           |
|                          |                                                   | Concurrent illness;                                                                                                                                         |
|                          |                                                   | No full blood count/ white blood count/ neutrophils/ eosinophils in > 1 month prior to admission.                                                           |
| <b>Endocrine</b>         |                                                   |                                                                                                                                                             |
| 26                       | Hypoglycaemia                                     | Use of insulin; OR                                                                                                                                          |
|                          |                                                   | Use of long-acting sulfonylurea in the 3 months prior to admission; AND                                                                                     |
|                          |                                                   | Inadequate blood glucose monitoring OR reduced adherence to diabetes treatment plan.                                                                        |
| 27                       | Diabetic complications (including hyperglycaemia) | Previously diagnosed with diabetes;                                                                                                                         |
|                          |                                                   | Use of a hypoglycaemic in the 6 months prior to admission; AND                                                                                              |
|                          |                                                   | No HbA1c in previous 6 months.                                                                                                                              |
| 28                       | Hypothyroidism or thyrotoxicosis                  | Use of amiodarone or lithium;                                                                                                                               |
|                          |                                                   | No thyroid function test in the 6 months prior to admission.                                                                                                |
| <b>Fracture or falls</b> |                                                   |                                                                                                                                                             |
| 29                       | Hip fracture or other fracture/break              | Aged 65 years or older; AND                                                                                                                                 |
|                          |                                                   | Use of long-term corticosteroids (> 1 month); AND/OR                                                                                                        |



|                     |                                                |                                                                                                                                                                       |
|---------------------|------------------------------------------------|-----------------------------------------------------------------------------------------------------------------------------------------------------------------------|
|                     |                                                | Use of sedating psychotropic medication (including TCAs, benzodiazepines, antipsychotics, opioids); AND/OR                                                            |
|                     |                                                | Use of cardiovascular drugs with high potential to cause postural hypotension (including nitrates, centrally acting adrenergic blockers and alpha-receptor blockers). |
| 30                  | Hip fracture                                   | Female gender;                                                                                                                                                        |
|                     |                                                | Prior fall from the standing level resulting in fracture;                                                                                                             |
|                     |                                                | No use of HRT, bisphosphonate or other osteoporosis medicine in the 6 months prior to admission.                                                                      |
| 31                  | Hip fracture                                   | Male gender;                                                                                                                                                          |
|                     |                                                | Prior fall from the standing level resulting in fracture;                                                                                                             |
|                     |                                                | No use of bisphosphonate or other osteoporosis medicine in the 6 months prior to admission.                                                                           |
| 32                  | Low-trauma fracture                            | Previous low-trauma fracture;                                                                                                                                         |
|                     |                                                | Not taking osteoporosis prevention therapy at time of admission.                                                                                                      |
| <b>Neurological</b> |                                                |                                                                                                                                                                       |
| 33                  | Acute confusion                                | Urinary tract infection un/inadequately treated                                                                                                                       |
| 34                  | Acute confusion                                | Use of two or more anticholinergic agents at the time of admission; OR                                                                                                |
|                     |                                                | Use of a highly anticholinergic agent at the time of admission; OR                                                                                                    |
|                     |                                                | Use of two or more of sedating prescription drugs and/or sedating antihistamines; OR                                                                                  |
|                     |                                                | Use of multiple psychotropic medicines ( $\geq 3$ unique medicines from ATC groups, N05 or N06) at the time of admission.                                             |
| 35                  | Seizure                                        | Use of an anticonvulsant;                                                                                                                                             |
|                     |                                                | Concurrent use of a medication which lowers the seizure threshold [as specified in the Australian Medicines Handbook]; AND/OR                                         |
|                     |                                                | Reduced compliance with anticonvulsant medication.                                                                                                                    |
| 36                  | Bipolar disorder                               | Prior hospitalisation for bipolar disorder;                                                                                                                           |
|                     |                                                | Use of lithium;                                                                                                                                                       |
|                     |                                                | No lithium drug level in the 3 months prior to admission.                                                                                                             |
| 37                  | Bipolar affective disorder/ psychotic disorder | Prior hospitalisation for bipolar disorder;                                                                                                                           |
|                     |                                                | No use of/ poor compliance with a mood stabiliser; OR                                                                                                                 |
|                     |                                                | Reduced compliance with long acting injection and/or oral medication.                                                                                                 |
| 38                  | Depression                                     | Prior diagnosis of depression;                                                                                                                                        |
|                     |                                                | Concurrent use of a moderately highly lipophilic beta blocker.                                                                                                        |

|                    |                                         |                                                                                                                                                                                                                                         |
|--------------------|-----------------------------------------|-----------------------------------------------------------------------------------------------------------------------------------------------------------------------------------------------------------------------------------------|
| 39                 | Depression [readmission]                | Reduced compliance with antidepressant or augmenting medications (mood stabiliser or antipsychotic); AND/OR<br>No review (including medication adherence) undertaken post previous admission.                                           |
| 40                 | Mania/hypomania                         | Use of antidepressants in the two months prior to admission;<br>No use of mood stabiliser in the two months prior to admission.                                                                                                         |
| 41                 | Attempted suicide                       | Use of SSRI in adolescents (up to 20 years old);<br>No psychiatric review in 12 months prior to admission.                                                                                                                              |
| 42                 | Psychotic episode                       | History of psychosis/ mental illness;<br>Reduced compliance with prescribed antipsychotic/ anxiolytic medication.                                                                                                                       |
| 43                 | Antidepressant withdrawal symptoms      | Abrupt cessation of antidepressant (especially short-acting such as paroxetine and venlafaxine).                                                                                                                                        |
| 44                 | Acute anxiety                           | Cessation of psychotropic medications (such as antidepressant and/or benzodiazepines) without monitoring.                                                                                                                               |
| 45                 | Eating disorder / electrolyte imbalance | Excessive laxative use; OR<br>Use/abuse of medications altering electrolyte levels (for example, loop diuretics).                                                                                                                       |
| 46                 | Serotonin toxicity                      | Use of multiple serotonergic agents that may contribute to serotonin toxicity (desvenlafaxine, duloxetine, MAOIs including moclobemide, SSRIs, TCAs, venlafaxine, fentanyl, tramadol, selegiline, lithium, tryptophan, St John's Wort). |
| <b>Renal</b>       |                                         |                                                                                                                                                                                                                                         |
| 47                 | Renal failure                           | Use of ACEI or ARB;<br>No BUN or serum creatinine test in the 12 months prior to admission.                                                                                                                                             |
| 48                 | Renal failure                           | Use of allopurinol;<br>No BUN or serum creatinine test in the 6 months prior to admission.                                                                                                                                              |
| 49                 | Renal failure                           | Use of lithium;<br>No BUN or serum creatinine test in the 3 months prior to admission.                                                                                                                                                  |
| 50                 | Renal failure                           | NSAID use for >3 months;<br>BUN or serum creatinine not monitored in the previous 12 months.                                                                                                                                            |
| 51                 | Renal failure                           | Use of methotrexate;<br>No BUN or serum creatinine test in the 6 months prior to admission.                                                                                                                                             |
| <b>Respiratory</b> |                                         |                                                                                                                                                                                                                                         |
| 52                 | Asthma AND/OR COPD                      | Prior hospitalisation for/or diagnosis of asthma/COPD; AND<br>No / inadequate maintenance therapy (LAMA, LABA, ICS); OR<br>Poor inhaler technique; AND/OR<br>No action plan in place; AND/OR                                            |

|                                      |                                              |                                                                                                                                                                                         |
|--------------------------------------|----------------------------------------------|-----------------------------------------------------------------------------------------------------------------------------------------------------------------------------------------|
|                                      |                                              | No smoking cessation advice given.                                                                                                                                                      |
| 53                                   | Asthma/COPD                                  | Prior hospitalisation for/or diagnosis of asthma and/or COPD;<br>Use of beta-blocker eye drops for glaucoma at the time of admission.                                                   |
| 54                                   | Chronic obstructive pulmonary disease (COPD) | Prior hospitalisation for/or diagnosis of COPD;<br>Use of a betablocker at the time of admission.                                                                                       |
| 55                                   | Acute respiratory failure                    | Prior hospitalisation for/or diagnosis of COPD;<br>Use of a medium to long-acting benzodiazepine at the time of admission.                                                              |
| 56                                   | Asthma                                       | Prior hospitalization for/or diagnosis of asthma/COPD;<br>High use (>2X per week) of a short-acting bronchodilator (SABA, SAMA);<br>No use of maintenance therapy (LAMA, LABA, ICS).    |
| 57                                   | Bronchiectasis                               | Two or more admissions with bronchiectasis exacerbations in last 12 months;<br>No prophylactic azithromycin trialled in the 12 months prior to admission.                               |
| <b>Genitourinary</b>                 |                                              |                                                                                                                                                                                         |
| 58                                   | Urinary retention                            | Prior diagnosis of benign prostatic hyperplasia OR bladder atony due to diabetes mellitus;<br>Current use of a drug with anticholinergic effects or an opioid at the time of admission. |
| 59                                   | Recurrent urinary tract infection            | No test for organism identification and sensitivity undertaken.                                                                                                                         |
| <b>Sexually Transmitted Diseases</b> |                                              |                                                                                                                                                                                         |
| 60                                   | Chlamydia or gonorrhoea                      | Untreated with antibiotics for more than 1 week after results received.                                                                                                                 |
| <b>Vaccine Preventable Diseases</b>  |                                              |                                                                                                                                                                                         |
| 61                                   | Pneumonia                                    | No pneumococcal vaccine if 'at risk' (chronic illness or >50 years);<br>No revaccination after 5 years.                                                                                 |
| 62                                   | Influenza                                    | No influenza vaccination in the past 12 months.                                                                                                                                         |
| 63                                   | Tetanus                                      | No/incomplete vaccination.                                                                                                                                                              |
| 64                                   | Diphtheria                                   | No/incomplete vaccination.                                                                                                                                                              |
| 65                                   | Whooping cough                               | No/incomplete vaccination.                                                                                                                                                              |
| 66                                   | Acute poliomyelitis                          | No/incomplete vaccination.                                                                                                                                                              |
| 67                                   | Varicella                                    | No/incomplete vaccination.                                                                                                                                                              |
| 68                                   | Measles                                      | No/incomplete vaccination.                                                                                                                                                              |
| 69                                   | Rubella                                      | No/incomplete vaccination.                                                                                                                                                              |
| 70                                   | Mumps                                        | No/incomplete vaccination.                                                                                                                                                              |
| 71                                   | Hepatitis A                                  | No/incomplete vaccination.                                                                                                                                                              |

|              |                                                                   |                                                                                                                                                                                                                                                                                                   |
|--------------|-------------------------------------------------------------------|---------------------------------------------------------------------------------------------------------------------------------------------------------------------------------------------------------------------------------------------------------------------------------------------------|
| 72           | Hepatitis B                                                       | No/incomplete vaccination.                                                                                                                                                                                                                                                                        |
| <b>Other</b> |                                                                   |                                                                                                                                                                                                                                                                                                   |
| 73           | Cellulitis                                                        | No treatment / inadequate treatment with antibiotics to treat staphylococcus aureus or streptococcus pyogenes with an appropriate antibiotic at time of admission.                                                                                                                                |
| 74           | Rheumatic fever (<21 years of age)                                | Prior diagnosis of rheumatic fever or rheumatic heart disease;<br>No benzathine penicillin (or erythromycin if allergic) in the last 28 days.                                                                                                                                                     |
| 75           | Gout attack                                                       | Previous history of gout;<br>Use of loop diuretics or thiazide diuretics.                                                                                                                                                                                                                         |
| 76           | Hepatitis C                                                       | No treatment with direct acting antivirals.                                                                                                                                                                                                                                                       |
| 77           | Methicillin resistant Staphylococcus aureus (MRSA) skin infection | Recurrent skin infection (>2 weeks);<br>Continuing use of $\beta$ -lactam antibiotic;<br>No skin swab taken.                                                                                                                                                                                      |
| 78           | Jaw osteonecrosis                                                 | Use of a bisphosphonate or denosumab;<br>No dental assessment within 6 months prior to admission.                                                                                                                                                                                                 |
| 79           | Trachoma                                                          | Untreated with appropriate antibiotics.                                                                                                                                                                                                                                                           |
| 80           | Iron deficiency anaemia                                           | Confirmed pregnancy;<br>No FBE test during pregnancy.                                                                                                                                                                                                                                             |
| 81           | Eclampsia                                                         | Prior diagnosis of hypertension (a systolic blood pressure of greater than or equal to 160mm Hg or a diastolic blood pressure greater than or equal to 110 mm Hg) during the current pregnancy;<br>No treatment with antihypertensive agent (suitable for use in pregnancy) at time of admission. |

DOAC = Direct oral anticoagulant; NSAID = non-steroidal anti-inflammatory; LMWH = low molecular weight heparin; GI = gastrointestinal; CHF = congestive heart failure; COX-2 = cyclooxygenase-2; ACEI = angiotensin-converting enzyme inhibitors; ARB = angiotensin II blockers; ARNi = angiotensin receptor-neprilysin inhibitors; MI = myocardial infarction; HMG-CoA = 3-hydroxy-3-methylglutaryl-CoA; CHA2Ds2Vasc = Congestive heart failure, Hypertension, Age, Diabetes, and Stroke/TIA Vascular disease (peripheral arterial disease, previous MI, aortic atheroma) [female gender is also included in this scoring system]; CVD = cardiovascular disease; TIA = transient ischaemic attack; TCA = tricyclic antidepressants; SIADH = syndrome of inappropriate antidiuretic hormone secretion; ECG = electrocardiogram; CRP = C-reactive protein; HbA1c = glycolated haemoglobin; HRT = hormone replacement therapy; ATC = anatomical therapeutic chemical; SSRI = selective serotonin reuptake inhibitor; MAOI = monoamine oxidase inhibitor; BUN = blood urea nitrogen; COPD = chronic obstructive pulmonary disease; LAMA = long-acting muscarinic antagonists; LABA = long-acting beta agonists; ICS = inhaled corticosteroids; SABA = short-acting beta-2 agonists; SAMA = short-acting muscarinic antagonist; MRSA = methicillin resistant Staphylococcus aureus; FBE = full blood examination; Hg = mercury.

\* The original indicator (from Kalish 2012<sup>11</sup>) forms the basis of this indicator but it has been modified either to (i) update the indicator to reflect current guidelines or new medicines in the class; (ii) combine with another indicator/s for simplification; or (iii) has been split into more indicators for clarity.

# The final list of clinical indicators has not been considered as part of any independent Health Technology Assessment (HTA) for effectiveness/cost-effectiveness.

## Discussion

The development of this updated clinical indicator list is an important step in addressing MRPs for Indigenous Australians. This study builds on earlier work which identified a set of clinical indicators for use in a general Australian population.[10, 11] The new list includes 81 indicators, sourced from 34 of the original 45 indicators and 47 newly identified indicators.

Panellists included specialist and general practice doctors, pharmacists, epidemiologists and researchers, the majority of whom had extensive experience in providing healthcare for Indigenous populations. The purpose of conducting this research was two-fold: firstly to provide a prespecified list of PPMRHs to define the primary outcome measure for the IMerSe feasibility study;<sup>[9]</sup> and as a resource for pharmacists conducting medication reviews for Indigenous Australians to assist in identifying sub-optimal processes of primary care related to medication use, defined for the IMerSe feasibility study as serious MRPs.<sup>[9]</sup>

AHSs offer Indigenous Australians access to holistic and person-centred primary care. The inclusion of pharmacists undertaking medication review services is important as much of the health burden experienced by Indigenous Australians results from chronic conditions such as renal and/or cardiovascular disease, type-II diabetes and mental illness, which in turn increases the requirement for ongoing medication regimens.[1, 24] There are reports that the levels of MRPs amongst Indigenous populations are of concern,<sup>[25, 26]</sup> although there is scant evidence of the size or extent of the problem. Further, Indigenous populations access the existing government funded medication review services<sup>3</sup> at a lower rate than non-Indigenous Australian for reasons including the lack of culturally responsive services, not

---

<sup>3</sup> The MedsCheck and Diabetes MedsCheck Programme provides for in-pharmacy reviews of consumers who are taking multiple medications and/or have newly diagnosed or poorly controlled type 2 diabetes. These reviews are aimed at enhancing the quality use of medicines and reducing the number of adverse drug events experienced by consumers. A Home Medicines Review (HMR) is designed to enhance the quality use of medicines and reduce the number of adverse medicine events by assisting consumers to better manage and understand their medicines through a medication review conducted by an accredited pharmacist in the patient's home (<http://www.6cpa.com.au/medication-management-programs>).

1  
2  
3 having established and trusting relationships with pharmacists and because pharmacists are  
4  
5 not usually integrated into AHSs.[27, 28]  
6  
7

8 The clinical indicator list developed in this study will be tested for predictive validity in two  
9  
10 ways through the IMerSe feasibility study: (i) as a primary outcome measure and as such,  
11  
12 will be used to classify a set of serious MRPs which can be analysed against a list of all  
13  
14 MRPs (regardless of severity); and (ii) to estimate the rate of PPMRHs in Indigenous  
15  
16 populations using a linked administrative data-set comprised of five years of hospital  
17  
18 admissions from the state of Queensland, Australia. This data set will be combined with  
19  
20 pharmaceutical and medical services usage for the same cohort of hospitalised individuals  
21  
22 (collected by the national government). Thus, the background rate of PPMRHs can be  
23  
24 identified, for arguably the most representative state in Australia in terms of Indigenous  
25  
26 Australians, as urban, rural and remote populations are all included. It is anticipated,  
27  
28 however, that it will not be possible to measure some of the indicators using these existing  
29  
30 administrative databases as insufficient clinical information (such as cardiovascular disease  
31  
32 risk) will be available. It is possible that this problem may decline over time as individual  
33  
34 health records become fully digitalised and shared in Australia.  
35  
36  
37  
38  
39  
40

41 The processes contributing to sub-optimal clinical care specified in the final indicator list  
42  
43 (Table 3) are termed serious MRPs; these may, or may not, result in a hospitalisation. Only  
44  
45 when a hospitalisation does occur is a PPMRH realised. Thus, we are interested not only in  
46  
47 the rate of PPMRHs in the Indigenous population, but also the rate of MRPs and the  
48  
49 translation rate of MRPs to PPMRHs. The reduction in MRPs of all severity, including  
50  
51 serious MRPs, is a key outcome of IMerSe feasibility study.  
52  
53  
54

55 A modified Delphi technique was used in this study to reach consensus between experts. The  
56  
57 Delphi technique allows for anonymity in responses, which permits all panellists an equal  
58  
59  
60

1  
2  
3 chance to have their opinion considered. A majority consensus was reached for 65 (80%) of  
4  
5 the total number of indicators at the end of Round 2 rating. Of the remaining indicators  
6  
7 (N=23), the majority required only a short discussion and/or brief changes to wording to  
8  
9 reach consensus Round 3 rating. The researchers considered that this meeting expediated  
10  
11 consensus on the remaining indicators and was a strength of the study. Unlike the RAND  
12  
13 appropriateness method, the modified Delphi rating process did not incorporate a formal  
14  
15 mechanism for considering the strength of evidence of the proposed indicators. This aspect  
16  
17 could not be incorporated into the present study, due to the lack of relevant research  
18  
19 specifically involving Indigenous Australians, and hence the lack of evidence for this specific  
20  
21 patient population.  
22  
23  
24  
25

26  
27 However, the existing indicator list, which was adapted for the present study was developed  
28  
29 using the RAND appropriateness measure,[10] and considered the strength of evidence  
30  
31 underpinning each indicator during the indicator development process. Thirty-four of the  
32  
33 indicators accepted in the present study were based on existing indicators, so nearly half of  
34  
35 the indicators were developed by explicitly considering the strength of evidence for the  
36  
37 particular indicator. During the moderated online and face-to-face discussions, the  
38  
39 researchers observed that clinicians incorporated current clinical guidelines into their  
40  
41 decision-making processes, although this was not undertaken in a formal way. This could be  
42  
43 viewed as a potential limitation of the study. Another possible limitation was the relatively  
44  
45 small number of panellists who agreed to participate, which could be due to workload  
46  
47 pressures for clinicians working in Indigenous health in Australia.  
48  
49  
50  
51

52  
53 By classifying a list of serious MRPs, the importance of other MRPs may be discounted. The  
54  
55 lack of adherence to medication regimens amongst Indigenous populations is of particular  
56  
57 concern, especially given the high rates of chronic disease such as diabetes, cardiovascular  
58  
59 disease, severe mental illness and renal disease that require regular medication. Barriers that  
60

1  
2  
3 limit adherence including poor health literacy, lack of access to medications (cost and  
4 physical access) and medication sharing with relatives and friends can all negatively impact  
5 on health through uncontrolled illness.[25] In the short term, health decrements due to low  
6 medication adherence may not result in hospitalisation, it may nonetheless contribute to life-  
7 threatening outcomes in the medium to longer term. It must be stressed that the final clinical  
8 indicator list developed here should only be used by pharmacists and other health  
9 professionals undertaking medication review services as a resource to optimise medication  
10 management. It does not provide a definitive list of the most serious problems, nor does it  
11 replace clinical judgement.  
12  
13  
14  
15  
16  
17  
18  
19  
20  
21  
22

### 23 24 **Conclusions**

25  
26  
27 The final list of clinical indicators developed in this study represents an initial, but important,  
28 step in quantifying serious MRPs and PPMRHs in Indigenous Australian populations. Such a  
29 list is not static and should be regularly updated in light of changes to clinical guidelines and  
30 medicines formularies. The health of Indigenous Australians may be enhanced by using this  
31 list as a resource during the process of medication review to identify sub-optimal processes of  
32 care and then institute corrective processes to prevent a potential hospitalisation.  
33  
34  
35  
36  
37  
38  
39  
40  
41  
42  
43  
44  
45  
46  
47  
48  
49  
50  
51  
52  
53  
54  
55  
56  
57  
58  
59  
60



1  
2  
3 **List of Abbreviations**  
4

5 AHS – Aboriginal health service  
6

7 CVG – clinical validation group  
8

9 IMeRSe - Indigenous Medication Review Service  
10

11 MRPs – medication-related problems  
12

13 PPMRHs – potentially preventable medication-related problems  
14  
15  
16  
17  
18  
19  
20  
21  
22  
23  
24  
25  
26  
27  
28  
29  
30  
31  
32  
33  
34  
35  
36  
37  
38  
39  
40  
41  
42  
43  
44  
45  
46  
47  
48  
49  
50  
51  
52  
53  
54  
55  
56  
57  
58  
59  
60

For peer review only

## References

1. Australian Government Department of Health. National Aboriginal and Torres Strait Islander Health Plan 2013-2023. 2013.
2. Freeman T, Edwards T, Baum F, Lawless A, Jolley G, Javanparast S, et al. Cultural respect strategies in Australian Aboriginal primary health care services: beyond education and training of practitioners. *Aust N Z J Public Health*. 2014;38(4):355-61.
3. Griese-Mammen N, Hersberger KE, Messerli M, Leikola S, Horvat N, van Mil JWF, et al. PCNE definition of medication review: reaching agreement. *Int J Clin Pharm*. 2018;40(5):1199-208.
4. Jokanovic N, Tan EC, van den Bosch D, Kirkpatrick CM, Dooley MJ, Bell JS. Clinical medication review in Australia: a systematic review. *Res Social Adm Pharm*. 2016;12(3):384-418.
5. van Mil JF, Westerlund LT, Hersberger KE, Schaefer MA. Drug-related problem classification systems. *Ann Pharmacother*. 2004;38(5):859-67.
6. Eichenberger PM, Lampert ML, Kahmann IV, van Mil JF, Hersberger KE. Classification of drug-related problems with new prescriptions using a modified PCNE classification system. *Pharm World Sci*. 2010;32(3):362-72.
7. Peterson G, Tenni P. Identifying, prioritising and documenting drug-related problems. *Aust Pharm*. 2004;23(10):23-9.
8. Roughead EE, Gilbert AL, Sansom LN, Primrose JG. Drug-related hospital admissions: a review of Australian studies published 1988-1996. *Med J Aust*. 1998;168(8):405-8.
9. Wheeler AJ, Spinks J, Kelly F, Ware RS, Vowles E, Stephens M, et al. Protocol for a feasibility study of an Indigenous Medication Review Service (IMerSe) in Australia. *BMJ Open*. 2018;8(11):e026462.
10. Caughey GE, Kalisch Ellett LM, Wong TY. Development of evidence-based Australian medication-related indicators of potentially preventable hospitalisations: a modified RAND appropriateness method. *BMJ Open*. 2014;4(4):e004625.
11. Kalisch LM, Caughey GE, Barratt JD, Ramsay EN, Killer G, Gilbert AL, et al. Prevalence of preventable medication-related hospitalizations in Australia: an opportunity to reduce harm. *Int J Qual Health Care*. 2012;24(3):239-49.
12. Campbell S, Braspenning Ja, Hutchinson A, Marshall M. Research methods used in developing and applying quality indicators in primary care. *Qual Saf Health Care*. 2002;11(4):358-64.
13. Murphy M. Consensus development methods, and their use in clinical guideline development. *Health Technol Assess*. 1998;2(3):1-88.
14. Hutchinson A, Fowler P. Outcome measures for primary health care: what are the research priorities? *Br J Gen Pract*. 1992;42(359):227-31.
15. Boulkedid R, Abdoul H, Loustau M, Sibony O, Alberti C. Using and reporting the Delphi method for selecting healthcare quality indicators: a systematic review. *PLoS One*. 2011;6(6):e20476.
16. Delbecq AL, Van de Ven AH, Gustafson DH. Group techniques for program planning: A guide to nominal group and Delphi processes: Scott, Foresman Glenview, IL; 1975.
17. Brook RH, Chassin MR, Fink A, Solomon DH, Kosecoff J, Park RE. A method for the detailed assessment of the appropriateness of medical technologies. *Int J Technol Assess Health Care*. 1986;2(1):53-63.
18. Shekelle P, Kahan J, Park R, Bernstein S. Assessing appropriateness by expert panels: how reliable? *J Gen Intern Med*. 1995;10:81-.
19. Shekelle PG, Kahan JP, Bernstein SJ, Leape LL, Kamberg CJ, Park RE. The reproducibility of a method to identify the overuse and underuse of medical procedures. *N Engl J Med*. 1998;338(26):1888-95.
20. Jones J, Hunter D. Consensus methods for medical and health services research. *BMJ: British Medical Journal*. 1995;311(7001):376.
21. Hepler CD, Strand LM. Opportunities and responsibilities in pharmaceutical care. *Am J Hosp Pharm*. 1990;47(3):533-43.

- 1  
2  
3 22. Limesurvey G. Limesurvey: An open source survey tool. In: Limesurvey GmbH H, Germany,  
4 editor.  
5  
6 23. Tolsgaard MG, Todsen T, Sorensen JL, Ringsted C, Lorentzen T, Ottesen B, et al. International  
7 multispecialty consensus on how to evaluate ultrasound competence: a Delphi consensus survey.  
8 PLoS One. 2013;8(2):e57687.  
9  
10 24. Australian Government Department of Health. Aboriginal and Torres Strait Islander People  
11 with a mental health condition. Canberra, Australia: Australian Bureau of Statistics; 2015.  
12  
13 25. Hamrosi K, Taylor S, Aslani P. Issues with prescribed medications in Aboriginal communities:  
14 Aboriginal health workers' perspectives. Rural Remote Health. 2006;6(2):557.  
15  
16 26. Davidson PM, Abbott P, Davison J, DiGiacomo M. Improving medication uptake in Aboriginal  
17 and Torres Strait Islander peoples. Heart Lung Circ. 2010;19(5-6):372-7.  
18  
19 27. Swain L, Barclay L. Exploration of Aboriginal and Torres Strait Islander perspectives of Home  
20 Medicines Review. Rural Remote Health. 2015;15(1).  
21  
22 28. Swain L, Barclay L. Medication reviews are useful, but the model needs to be changed:  
23 Perspectives of Aboriginal Health Service health professionals on Home Medicines Reviews. BMC  
24 Health Serv Res. 2015;15(1):366.  
25  
26  
27  
28  
29  
30  
31  
32  
33  
34  
35  
36  
37  
38  
39  
40  
41  
42  
43  
44  
45  
46  
47  
48  
49  
50  
51  
52  
53  
54  
55  
56  
57  
58  
59  
60

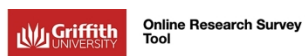

## Indigenous Medication Review Service - Clinical Validation Group

69%

### Haemorrhagic event

**1. Haemorrhagic event (Original indicator set)**

- *Use of Warfarin*
- *Concurrent use of an interacting antibiotic*
- *No INR test in the 5 days prior to admission*

**Comments for consideration:**  
None so far

|               | Accept indicator unchanged | Reject indicator      | Specify alternative   | Not sure              |
|---------------|----------------------------|-----------------------|-----------------------|-----------------------|
| Please select | <input type="radio"/>      | <input type="radio"/> | <input type="radio"/> | <input type="radio"/> |

Figure 1: Example of online survey question

358x249mm (300 x 300 DPI)

# BMJ Open

## Adaptation of potentially preventable medication-related hospitalisation indicators for Indigenous populations in Australia using a modified Delphi technique

|                                 |                                                                                                                                                                                                                                                                                                                                                                                                                                                                                                                                                                                                                                                                                                                             |
|---------------------------------|-----------------------------------------------------------------------------------------------------------------------------------------------------------------------------------------------------------------------------------------------------------------------------------------------------------------------------------------------------------------------------------------------------------------------------------------------------------------------------------------------------------------------------------------------------------------------------------------------------------------------------------------------------------------------------------------------------------------------------|
| Journal:                        | <i>BMJ Open</i>                                                                                                                                                                                                                                                                                                                                                                                                                                                                                                                                                                                                                                                                                                             |
| Manuscript ID                   | bmjopen-2019-031369.R1                                                                                                                                                                                                                                                                                                                                                                                                                                                                                                                                                                                                                                                                                                      |
| Article Type:                   | Original research                                                                                                                                                                                                                                                                                                                                                                                                                                                                                                                                                                                                                                                                                                           |
| Date Submitted by the Author:   | 31-Oct-2019                                                                                                                                                                                                                                                                                                                                                                                                                                                                                                                                                                                                                                                                                                                 |
| Complete List of Authors:       | Spinks, Jean; Griffith University, Centre for Applied Health Economics, Menzies Institute for Health Queensland<br>Kalisch Ellett, Lisa; University of South Australia, Sansom Institute for Health Research, School of Pharmacy and Medical Sciences, Quality Use of Medicines and Pharmacy Research Centre<br>Spurling, Geoffrey ; University of Queensland, Primary Care Clinical Unit<br>Theodoros, Theo; Metro South, Addiction and Mental Health Services<br>Williamson, Daniel; Queensland Health , Aboriginal and Torres Strait Islander Health Branch<br>Wheeler, Amanda; Griffith Health Institute, Griffith University, Menzies Health Institute; University of Auckland, Faculty of Health and Medical Sciences |
| <b>Primary Subject Heading</b>: | Health services research                                                                                                                                                                                                                                                                                                                                                                                                                                                                                                                                                                                                                                                                                                    |
| Secondary Subject Heading:      | Health policy                                                                                                                                                                                                                                                                                                                                                                                                                                                                                                                                                                                                                                                                                                               |
| Keywords:                       | Indigenous health, potentially preventable medication-related hospitalisations, medication review, clinical indicators                                                                                                                                                                                                                                                                                                                                                                                                                                                                                                                                                                                                      |
|                                 |                                                                                                                                                                                                                                                                                                                                                                                                                                                                                                                                                                                                                                                                                                                             |

SCHOLARONE™  
Manuscripts

1  
2  
3 **Adaptation of potentially preventable medication-related hospitalisation indicators for**  
4  
5 **Indigenous populations in Australia using a modified Delphi technique**  
6  
7

8 Jean Spinks<sup>1</sup>, Lisa Kalisch Ellet<sup>2</sup>, Geoffrey Spurling<sup>3</sup>, Theo Theodoros<sup>4,5</sup>, Daniel  
9 Williamson<sup>6</sup>, Amanda J Wheeler<sup>7,8</sup>  
10

11  
12  
13  
14 <sup>1</sup> Centre for Applied Health Economics, Menzies Health Institute Queensland, Griffith  
15 University, Kessels Road, Nathan, Qld 4111  
16

17  
18  
19 Corresponding author: Jean Spinks  
20

21  
22 [j.spinks@griffith.edu.au](mailto:j.spinks@griffith.edu.au) Ph: +61 7 37359101  
23  
24

25 <sup>2</sup> Quality Use of Medicines and Pharmacy Research Centre, University of South Australia,  
26 GPO Box 2471, Adelaide, SA 5001  
27  
28

29  
30 <sup>3</sup> Primary Care Clinical Unit, The University of Queensland, Royal Brisbane and Women's  
31 Hospital, Health Sciences Building, Herston, Qld, 4005.  
32  
33

34  
35 <sup>4</sup> Metro South Addiction and Mental Health Services, Brisbane, QLD, Australia  
36

37  
38 <sup>5</sup> University of Queensland, Brisbane, QLD, Australia  
39

40  
41 <sup>6</sup> Aboriginal and Torres Strait Islander Health Branch, Queensland Health  
42

43  
44 <sup>7</sup> Menzies Health Institute Queensland, Griffith University, Brisbane, Queensland, Australia  
45

46  
47 <sup>8</sup> Faculty of Medical and Health Sciences, Auckland University, Auckland, New Zealand.  
48

49 ORCID ID: <https://orcid.org/0000-0001-9755-6746>  
50

51  
52  
53  
54 Word count: 2,774  
55  
56  
57  
58  
59  
60

## Abstract

**Objectives:** One of the outcomes of a medication review service is to identify and manage medication-related problems (MRPs). The most serious MRPs may result in hospitalisation, which could be preventable if appropriate processes of care were adopted. The aim of this study was to update and adapt a previously published set of clinical indicators for use in assessing the effectiveness of a medication review service tailored to meet the needs of Indigenous<sup>1</sup> people, who experience some of the worst health outcomes of all Australians.

**Design:** A modified Delphi technique was used to: (i) identify additional indicators for consideration; (ii) assess whether the original indicators were relevant in the context of Indigenous health; and (iii) reach consensus on a final set of indicators. Three rounds of rating were used via an anonymous online survey, with 70% agreement required for indicator inclusion.

**Setting:** The indicators were designed for use in Indigenous primary care in Australia.

**Participants:** Thirteen panellists participated including medical specialists, general practice doctors, pharmacists and epidemiologists experienced in working with Indigenous patients.

**Results:** Panellists rated 102 indicators (45 from the original set and 57 newly identified). Of these, 41 were accepted unchanged, 7 were rejected and the remainder were either modified before acceptance or merged with other indicators. A final set of 81 indicators was agreed.

**Conclusions:** This study provides a set of clinical indicators to be used as a primary outcome measure for medication review services for Indigenous people in Australia and as a prompt for pharmacists and doctors conducting medication reviews.

---

<sup>1</sup> Please note that the use of the term 'Indigenous' in this manuscript includes all Aboriginal and Torres Strait Islander people and acknowledges their rich traditions and heterogenous cultures.

## Article Summary

### Strengths and limitations of the study:

- This is the first set of clinical indicators developed to identify potentially preventable medication-related hospitalisations (PPMRHs) in Indigenous Australians;
- The set of clinical indicators developed can be used to measure serious medication-related problems (MRPs) in Indigenous Australians and be used as a resource by health professionals conducting medication review services;
- The set of clinical indicators forms the primary outcome measure of an Indigenous Medication Review Service (IMeRSe) feasibility study;
- The participant sample size for this study was limited, possibly due to workload constraints of clinicians working in Indigenous health in Australia;
- This study makes an important contribution to the literature by developing a quantitative measure that can be used to improve medication outcomes for Indigenous Australians.

**Keywords:** Indigenous health; potentially preventable medication-related hospitalisations; medication review; clinical indicators

**Trial registration:** The trial registration for the IMeRSe feasibility study is ACTRN12618000188235.

**Funding Statement:** This activity received grant funding from the Australian Government.

**Competing interests statement:** None declared.

**Author contributions:** JS was responsible for study concept, design, data collection and wrote the first draft of the manuscript. AJW designed the research protocol, is the principle investigator and was involved in the design and data collection. LK, GS, TT & DW



1  
2  
3 contributed to methodology and data collection. All authors were involved in the revision of  
4 this paper and made a contribution to the intellectual content and approved the final version  
5  
6 of the paper.  
7  
8  
9

### 10 **Availability of data and materials**

11  
12  
13 The dataset generated and analysed for this study is not publicly available as consent from  
14 participants was not sought to share the data more widely than for the purpose of this study.  
15  
16

17  
18 **Acknowledgements:** The Indigenous Medication Review Service (IMeRSe) feasibility study  
19 has been developed in partnership with The Pharmacy Guild of Australia, the National  
20 Aboriginal Community Controlled Health Organisation (NACCHO) and Griffith University.  
21  
22

23  
24 The authors would like to acknowledge the time and experience of the panellists who  
25 participated in this study and Dr Helen Stapleton for providing feedback on the manuscript.  
26  
27

28  
29 The authors would also like to thank the Expert Panel for their ongoing contribution to the  
30 IMeRSe study. This activity received grant funding from the Australian Government. The  
31 researchers were independent from the funder. This article contains the opinions of the  
32 authors and does not in any way reflect the views of the Department of Health or the  
33 Australian Government. The financial assistance provided must not be taken as endorsement  
34 of the contents of this article. There was no direct public or patient involvement in the  
35 research reported in this manuscript, however, patient and public involvement has been  
36 achieved in the IMeRSe feasibility study.  
37  
38  
39  
40  
41  
42  
43  
44  
45  
46  
47  
48  
49  
50  
51  
52  
53  
54  
55  
56  
57  
58  
59  
60

## Introduction

Aboriginal and Torres Strait Islander people in Australia experience higher rates of disease burden compared with other Australians, particularly for chronic disease.[1] As pharmacotherapy is one of the principal tools used to manage chronic conditions, this creates a challenge for health services providers to coordinate medication services within a culturally respectful and comprehensive primary health care system,[2] and minimise medication related harm. Medication review is a structured evaluation of an individual's medications to optimise medication use and health outcomes.[3] An important component of a medication review involves a pharmacist identifying medication related problems (MRPs) and, in consultation with the prescriber, suggesting management options.

Medication reviews have been shown to significantly increase the identification and resolution of MRPs, although there is limited evidence to show that they reduce hospital admissions,[4] possibly because there are many types of MRPs with varying degrees of severity and preventability.[5-7] Although the most serious MRPs can lead to hospitalisation[8] some are unpredictable and therefore not considered preventable, for example, atypical adverse drug reactions. However other MRPs are potentially preventable, for example, where clinical care preceding the hospitalisation event is not in accordance with accepted clinical guidelines.

Potentially preventable medication-related hospitalisations (PPMRHs) are the result of a proportion of serious MRPs.[8] Clinical indicators have been developed and used in a number of countries to measure PPMRHs which link sub-optimal care involving medication use with subsequent hospitalisation [9-11]. However, differences have been found, for example, between the UK and USA in terms of the inclusion of particular indicators, presumably guided by the prevalence of different health conditions in different population groups and

1  
2  
3 health system differences.[12] Thus, although a set of PPMRH indicators have been  
4  
5 developed for use in the Australian population [13,14], it cannot be assumed that this is a  
6  
7 robust measure for specific subsets of the Australian population with distinct healthcare  
8  
9 needs, like Indigenous people.  
10  
11

12  
13 There are a number of advantages of using PPMRHs as the primary outcome in a medication  
14  
15 review intervention as they: (i) are pre-specified, removing potential classification bias from  
16  
17 the primary outcome; (ii) can be costed, for easy inclusion in an economic evaluation; and  
18  
19 (iii) offer a meaningful target for pharmacists and other clinicians undertaking medication  
20  
21 reviews in clinical settings.  
22  
23

24  
25 The Indigenous Medication Review Service (IMeRSe) feasibility study is being undertaken  
26  
27 across nine Australian sites including remote, regional and urban locations, with the aim of  
28  
29 developing and testing the feasibility of a culturally appropriate, strengths-based, medication  
30  
31 review service.[15] The IMeRSe intervention is delivered by local community pharmacists  
32  
33 (on a fee-for-service basis) integrated with local Aboriginal health services (AHSs). Previous  
34  
35 research has shown that Indigenous people encounter barriers to accessing medication review  
36  
37 services[16, 17], thus the aim of IMeRSe is to overcome these barriers and meet the health  
38  
39 needs of the population.[15]  
40  
41  
42

43  
44 Here we report on the modification of the existing set of 45 PPMRH indicators which were  
45  
46 originally developed for use in the general Australian population and validated using a large  
47  
48 veterans cohort.[13, 14] However, the indicators needed to be revised;to ensure: (i) utility, as  
49  
50 an appropriate primary outcome measure in the IMeRSe feasibility study; and (ii) currency  
51  
52 and applicability, in light of changes to clinical guidelines and best practice. Inclusion criteria  
53  
54 for the IMeRSe study specifies participants to be over 18 years and identify as being  
55  
56 Aboriginal or Torres Strait Islander[15], meaning participants will likely be younger and  
57  
58  
59  
60

1  
2  
3 experience different health conditions than the general Australian population[1]. Thus, the list  
4  
5 of previously identified PPMRHs needs to be revised to reflect the health problems faced by  
6  
7 this population.  
8  
9

10 The objective of this study was to develop a meaningful and clinically relevant outcome  
11  
12 measure for use in the Indigenous Medication Review Service pilot study (IMeRSe)[15],  
13  
14 which is trialling the feasibility of a culturally appropriate, strengths-based, medication  
15  
16 review service.  
17  
18

## 19 20 **Methods**

21  
22  
23 In general terms, the selection of clinical indicators to measure processes and outcomes of  
24  
25 primary care should meet the criteria of validity, reproducibility, acceptability, feasibility,  
26  
27 reliability, sensitivity, and predictive validity.[18] Consensus methods are one way of  
28  
29 developing, or refining, a set of clinical indicators to meet these criteria. The Delphi  
30  
31 technique has been widely used in health research to achieve consensus on a particular topic  
32  
33 where expert opinion is the main source of evidence,[19, 20] including the development of  
34  
35 healthcare quality indicators.[21] Other consensus methods, such as the nominal group  
36  
37 technique,[22] or the RAND appropriateness method,[23-26] may also be appropriate;  
38  
39 however, the Delphi technique has the advantage of involving a sufficiently representative  
40  
41 group of experts whilst being less resource intensive than alternative methods.  
42  
43  
44  
45

### 46 47 *Selection of Delphi panellists*

48  
49  
50 The IMeRSe feasibility study Expert Stakeholder Panel (which included Indigenous advisors)  
51  
52 identified potential panellists for the Clinical Validation Group (CVG).[15] The function of  
53  
54 the Expert Stakeholder Panel is to ensure that all aspects of the study are culturally  
55  
56 appropriate and respect Indigenous practices, protocols and community engagement.  
57  
58

59 Potential CVG panellists were identified by the Expert Stakeholder Panel as either having  
60

1  
2  
3 current clinical experience as a doctor or a pharmacist in an Indigenous health setting, or  
4 medication safety expertise from a public health perspective. Ideally, Indigenous clinicians  
5 and researchers would constitute the whole of the CVG, however whilst the CVG did have  
6 Indigenous representation and attempts were made to include more, we were not able to  
7 convene an entirely Indigenous CVG. Potential panellists were approached via email,  
8 provided with participant information forms and instructions, and contact details to obtain  
9 further information, as required. Panellists were made aware that informed consent was  
10 implied by acceptance of the invitation via return email. Of the 40 eligible panellists  
11 approached to participate, 13 agreed. Panellists were offered a small honorarium to  
12 compensate them for their time. Ethics approval was granted from Griffith University Human  
13 Research Ethics Committee (GU ref No:2018/126) for this study.

### 28 *Rating rounds*

29  
30  
31  
32 Prior to the start of the first rating round, consented panellists were interviewed individually  
33 by a member the research team (JS) to ensure they had a chance to clarify the Delphi process.  
34 During the interview, panellists were asked to identify any additional indicators that they  
35 believed should be considered in addition to the original 45 indicators[14] or email them after  
36 the interview, if preferred. Panellists were asked to only identify indicators that met the  
37 criteria of preventable drug-related morbidity, as defined by Hepler & Strand[27] who  
38 specify three necessary elements:  
39  
40  
41  
42  
43  
44  
45  
46  
47

- 48 1. The drug-related problem must be recognisable, and the likelihood of an undesirable  
49 clinical outcome must be foreseeable;
  - 50 2. The causes of that outcome must be identifiable;
  - 51 3. The causes must be controllable.
- 52  
53  
54  
55  
56  
57  
58  
59  
60

1  
2  
3 Panellists were also asked to consider indicators that, from their own clinical experience,  
4 represented the greatest burden to population health for Indigenous Australians. Additional  
5 indicators considered to be relevant were added to the original list of 45 indicators to form a  
6 Master List. Three rounds of rating and consensus were then undertaken using this list as a  
7 starting point.  
8  
9

10  
11  
12  
13  
14  
15 The first two rating rounds were sent to all panellists via email link in an online format hosted  
16 in LimeSurvey.[28] Panellists were asked to carefully consider each indicator presented and  
17 then choose from four options: (i) accept indicator unchanged; (ii) reject indicator; (iii)  
18 specify alternative; or (iv) not sure. Panellists were asked to provide comments or a rationale  
19 for rejecting an indicator or providing an alternative. An example of the online presentation  
20 of a clinical indicator to panellists is shown in Figure 1.  
21  
22  
23  
24  
25  
26  
27  
28  
29

30 << Figure 1 about here >>  
31

32  
33 The indicator was accepted unchanged if at least 70% of panellists chose the option “Accept  
34 indicator unchanged” or rejected if at least 70% of panellists chose the option “Reject  
35 indicator” in accordance with previous modified Delphi methods.[29] The indicators which  
36 were accepted unchanged or rejected were removed and did not appear in subsequent rating  
37 rounds. All other indicators (where an alternative was proposed) were collated alongside the  
38 panellists’ comments or rationale, by the researchers. The researchers considered the  
39 comments, consulted any relevant clinical literature and offered alternative wording for the  
40 disputed indicator. Panellists’ comments were (anonymously) reported *verbatim* in the  
41 subsequent rating round, alongside the researchers proposed new wording of the indicator  
42 and links to any relevant clinical literature or guidelines. Researchers set a deadline of two  
43 weeks for responses after the online survey was opened. Panellists could login to the survey  
44 again if they had not completed it, and previous responses could be altered at any time prior  
45  
46  
47  
48  
49  
50  
51  
52  
53  
54  
55  
56  
57  
58  
59  
60

1  
2  
3 to survey submission. Reminder emails were sent one week before the deadline and requests  
4  
5 for additional time was granted for participants to complete the rating round, if required.

6  
7  
8 Every effort was made by the research team to enable all 13 participants to complete the first  
9  
10 two rating rounds.

11  
12  
13 The third rating round involved a face-to-face meeting of an invited sub-group (n=3) of the  
14  
15 larger consensus group; a representative from each main speciality area (specialist doctor,  
16  
17 general practice doctor, clinical pharmacist) provided expert commentary regarding any  
18  
19 remaining discrepancies. Consensus in this final round was achieved following open group  
20  
21 discussion which was moderated by the researchers (JS/AW).

### 22 23 24 25 *Patient and Public Involvement*

26  
27  
28 Patient and public involvement has been achieved in the IMeRSe feasibility study, and will be  
29  
30 ongoing over the study lifetime, through extensive collaboration with the relevant  
31  
32 representatives of both Partner organisations. As described above (*Selection of Delphi*  
33  
34 *panellists*), working with key Indigenous groups, both locally and as members of the Expert  
35  
36 Panel, will be integral to the ongoing engagement process (e.g. via the inclusion of community  
37  
38 juries, councils and boards). This process will be informed by the local requirements at each  
39  
40 site throughout this feasibility study. Acceptability outcomes for consumer participants will be  
41  
42 assessed as described previously[15]. Dissemination to Indigenous participants and  
43  
44 communities will be a priority, with processes guided by the Expert Panel and informed by key  
45  
46 stakeholders at a local site level.

## 47 48 49 50 **Results**

### 51 52 53 *CVG panellists*

54  
55  
56  
57 A total of 13 panellists, five females and eight males, from five clinical areas participated  
58  
59 between May and November 2018. Panellists had a mean of 17 years experience in their  
60

clinical areas and 11 years experience working with Indigenous people in their current role (Table 1); one panellist identified as being an Aboriginal or Torres Strait Islander person. Panellists were drawn from six of the nine states and territories across Australia from and from urban, rural and remote locations (detailed information is withheld to maintain the anonymity of panellists).

**Table 1: Clinical Validation Group (CVG) Panel**

| Clinical expertise   | Number | %  |
|----------------------|--------|----|
| Pharmacist           | 5      | 39 |
| Specialist doctor    | 3      | 23 |
| General practitioner | 2      | 15 |
| Researcher           | 2      | 15 |
| Epidemiologist       | 1      | 8  |

### *Clinical indicators*

In addition to the original 45 indicators,[11] panellists identified a further 56 new indicators. Hence, the Master List of indicators at the start of Round 1 rating comprised 101 indicators. During each of the rating rounds, panellists made suggestions to split and merge indicators, meaning the number of indicators for consideration could increase or decrease between rounds. The number of clinical indicators from the Master List accepted or rejected in each rating round, grouped by clinical presentation, are summarised in Table 2.

**Table 2: Number of clinical indicators, grouped by clinical presentation and round**

| Clinical Presentation                     | Previous List <sup>a</sup> | Master List | Accepted Round 1 | Accepted Round 2 | Accepted Round 3 | Rejected       |
|-------------------------------------------|----------------------------|-------------|------------------|------------------|------------------|----------------|
| Neurological                              | 7                          | 17          | 7                | 11               | <b>14</b>        | 0              |
| Vaccine preventable diseases              | 0                          | 12          | 11               | 11               | <b>12</b>        | 0              |
| Electrolytes and laboratory abnormalities | 8                          | 15          | 4                | 7                | <b>10</b>        | 1 <sup>†</sup> |
| Cardiovascular                            | 6                          | 12          | 1                | 6                | <b>9</b>         | 0              |
| Respiratory                               | 4                          | 6           | 4                | 5                | <b>6</b>         | 0              |
| Renal                                     | 3                          | 5           | 1                | 3                | <b>5</b>         | 0              |
| Fracture or falls                         | 4                          | 6           | 3                | 3                | <b>4</b>         | 0              |
| Haemorrhagic event                        | 3                          | 5           | 1                | 2                | <b>3</b>         | 0              |
| Gastrointestinal                          | 4                          | 4           | 0                | 3                | <b>3</b>         | 0              |
| Endocrine                                 | 4                          | 6           | 3                | 3                | <b>3</b>         | 0              |
| Genitourinary                             | 2                          | 3           | 1                | 2                | <b>2</b>         | 0              |



|                                        |           |            |           |           |           |          |
|----------------------------------------|-----------|------------|-----------|-----------|-----------|----------|
| Sexually transmitted infections (STIs) | 0         | 1          | 0         | 1         | <b>1</b>  | 0        |
| Other                                  | 0         | 10         | 5         | 8         | <b>9</b>  | 0        |
| <b>Total*</b>                          | <b>45</b> | <b>102</b> | <b>41</b> | <b>65</b> | <b>81</b> | <b>1</b> |

\*NOTE: Totals are not cumulative as during the rating process, panellists suggested that some indicators should be merged or split.

<sup>a</sup> The list of PPMRHs previously developed for the general Australian population[13, 14].

At the end of Round 2 rating, 65 indicators (80% of the final total) were agreed upon by the panellists. The three-person sub-group of the CVG invited to undertake Round 3 rating formed consensus on the remaining 23 indicators during a two-hour face-to-face meeting (one panellist phoned-in), moderated by the research team (JS/AW). One clinical indicator was rejected during this round, with the remaining 22 indicators either accepted or merged with other indicators.

The final list of accepted indicators is presented in Table 3. Thirty-four indicators from the original list of 45 were accepted by panellists, although 21 of these were updated in some way to reflect: (i) changes in current guidelines or new medicines; (ii) having been combined with other similar indicators for simplification; (iii) having been split into additional indicators for clarity. Forty-seven new indicators were added, giving a final total of 81 indicators.

**Table 3: Final list of potentially preventable medication-related hospitalisations (PPMRHs) for Indigenous Australians<sup>#</sup>**

| Number                    | Hospitalisation outcome to avoid                | Process of sub-optimal clinical care prior to hospitalisation                                                                                                                                                                                                                                                                                                          | Source    |
|---------------------------|-------------------------------------------------|------------------------------------------------------------------------------------------------------------------------------------------------------------------------------------------------------------------------------------------------------------------------------------------------------------------------------------------------------------------------|-----------|
| <b>Haemorrhagic event</b> |                                                 |                                                                                                                                                                                                                                                                                                                                                                        |           |
| 1                         | Haemorrhagic event                              | Use of warfarin;<br>Concurrent use of an interacting antibiotic;<br>No INR test in the 5 days prior to admission.                                                                                                                                                                                                                                                      | Original  |
| 2                         | Haemorrhagic event                              | Use of warfarin;<br>No INR test in the 6 weeks prior to admission.                                                                                                                                                                                                                                                                                                     | Original* |
| 3                         | Haemorrhagic event                              | Use of one or more antithrombotics (warfarin, DOAC, aspirin, NSAID, clopidogrel, LMWH);<br>AND<br>No haemoglobin test within the past year; OR<br>No monitoring of renal function in the previous 6 months; OR<br>Use of triple therapy (dual antiplatelet plus oral anticoagulant) for more than one month prior to admission.                                        | Original* |
| <b>Gastrointestinal</b>   |                                                 |                                                                                                                                                                                                                                                                                                                                                                        |           |
| 4                         | Gastritis, GI bleed, GI ulcer or GI perforation | History of or prior hospitalisation for GI ulcers or GI bleed;<br>Use of NSAID (including aspirin) for a period of at least 1 month prior to admission.                                                                                                                                                                                                                | Original* |
| 5                         | Gastritis, GI bleed, GI ulcer or GI perforation | History of prior hospitalisation for GI ulcers or GI bleed; AND<br>Use of gastric toxin (e.g. oral corticosteroids, NSAIDs, antiplatelet agents, bisphosphonates, anticoagulants, cholinesterase inhibitor) for a period of at least 3 months prior to admission;<br>AND<br>No cytoprotection (e.g. proton pump inhibitor).                                            | Original* |
| 6                         | Bowel impaction                                 | Use of two or more medications known to retard gastrointestinal motility (including anticholinergic agents, calcium channel blockers, antacids, and iron preparations) at the time of admission; OR<br>Use of a highly anticholinergic agent at the time of admission; OR<br>Use of an opioid analgesic without concurrent use of a laxative at the time of admission. | Original* |
| <b>Cardiovascular</b>     |                                                 |                                                                                                                                                                                                                                                                                                                                                                        |           |
| 7                         | Congestive heart failure or fluid overload      | Prior hospitalisation for/or diagnosis of high blood pressure or CHF;<br>Use of an agent known to exacerbate CHF including NSAIDs, COX-2 inhibitors, anti-arrhythmics (apart from beta-blockers or amiodarone), non-dihydropyridine calcium-channel blockers in systolic CHF (verapamil, diltiazem), corticosteroids, clozapine, tricyclic anti-                       | Original* |

|                                                  |                                                                  |                                                                                                                                                                       |           |
|--------------------------------------------------|------------------------------------------------------------------|-----------------------------------------------------------------------------------------------------------------------------------------------------------------------|-----------|
|                                                  |                                                                  | depressants, tyrosine kinase inhibitors, thiazolidinediones or tumour necrosis factor antagonists at time of admission.                                               |           |
| 8                                                | Congestive heart failure or fluid overload                       | Prior hospitalisation for/ or diagnosis of heart failure;                                                                                                             | Original  |
|                                                  |                                                                  | No use of ACEI, ARB or ARNi (angiotensin receptor neprilysin inhibitor) at time of admission.                                                                         |           |
| 9                                                | Myocardial Infarction                                            | History of acute coronary syndrome / previous MI;                                                                                                                     | Original* |
|                                                  |                                                                  | No use of anti-platelet(s) OR beta-blocker (reduced left-ventricular systolic function only) OR HMG-CoA reductase inhibitor in the 3 months prior to hospitalisation. |           |
| 10                                               | Myocardial infarction                                            | Insertion of stent within the previous 12 months;                                                                                                                     | New       |
|                                                  |                                                                  | No use of dual anti-platelet in 2 months prior to admission.                                                                                                          |           |
| 11                                               | Thromboembolic cerebrovascular event                             | Prior diagnosis of atrial fibrillation;                                                                                                                               | Original* |
|                                                  |                                                                  | No use of anticoagulant in the 3 months prior to admission in a patient with high risk according to CHA2Ds2Vasc score.                                                |           |
| 12                                               | Acute coronary syndrome                                          | CVD risk known to be >15% prior to admission;                                                                                                                         | New       |
|                                                  |                                                                  | Not on lipid lowering therapy AND/OR antihypertensive therapy.                                                                                                        |           |
| 13                                               | Transient ischaemic attack (TIA)/<br>Ischaemic stroke            | Pulse quality/blood pressure not tested within past 24 months;                                                                                                        | New       |
|                                                  |                                                                  | No use of any of antiplatelet, antihypertensive, anticoagulant, lipid lowering therapy.                                                                               |           |
| 14                                               | Ischaemic coronary event                                         | History of angina or acute coronary syndrome;                                                                                                                         | New       |
|                                                  |                                                                  | No use of beta-blocker, calcium channel blocker or nitrates.                                                                                                          |           |
| 15                                               | Ischaemic event                                                  | History of diabetes;                                                                                                                                                  | New       |
|                                                  |                                                                  | History of ischaemic event;                                                                                                                                           |           |
|                                                  |                                                                  | No antiplatelet or lipid lowering therapy.                                                                                                                            |           |
| <b>Electrolytes and laboratory abnormalities</b> |                                                                  |                                                                                                                                                                       |           |
| 16                                               | Blood dyscrasia                                                  | Use of an agent known to cause blood dyscrasias (including carbimazole, sulphonylureas, propylthiouracil, methotrexate, sulphasalazine);                              | Original* |
|                                                  |                                                                  | No complete blood count or platelet test in the 6 months prior to admission.                                                                                          |           |
| 17                                               | Syndrome of inappropriate antidiuretic hormone secretion (SIADH) | Use of TCAs, carbamazepine, ACEIs, other antidepressants;                                                                                                             | Original* |
|                                                  |                                                                  | No electrolyte test in the 12 months prior to admission.                                                                                                              |           |
| 18                                               | Electrolyte imbalance                                            | Use of diuretics, ACEI/ARB, spironolactone, potassium supplements or calcium supplements;                                                                             | Original* |
|                                                  |                                                                  | No electrolyte test in the 12 months prior to admission; AND                                                                                                          |           |
|                                                  |                                                                  | No renal function test in the 12 months prior to admission.                                                                                                           |           |

|                          |                                                   |                                                                                                                                                                                                       |           |
|--------------------------|---------------------------------------------------|-------------------------------------------------------------------------------------------------------------------------------------------------------------------------------------------------------|-----------|
| 19                       | Anticonvulsant drug toxicity                      | Use of anticonvulsant requiring therapeutic drug monitoring;<br>No drug level test in the 6 months prior to admission.                                                                                | Original  |
| 20                       | Digoxin toxicity                                  | Use of digoxin;<br>No renal function test in the 12 months prior to admission; AND<br>No potassium serum level in the 6 months prior to admission.                                                    | Original* |
| 21                       | Lithium toxicity                                  | Use of lithium;<br>No lithium drug level test in the 3 months prior to admission.                                                                                                                     | Original  |
| 22                       | Clozapine-related blood dyscrasias                | Use of clozapine;<br>No full blood count/white blood count/neutrophils/ eosinophils in >1 month prior to admission or within the previous week in the first 18 weeks of therapy.                      | New       |
| 23                       | Clozapine-induced myocarditis/cardiomyopathy      | Use of clozapine;<br>No baseline echocardiogram; OR<br>ECG in the previous 12 months; OR<br>troponin in the previous 12 months; OR<br>CRP (C-reactive protein) in previous 12months before admission. | New       |
| 24                       | Clozapine toxicity/failure                        | Use of clozapine;<br>Altered smoking status whilst on clozapine (may vary levels and result in toxicity or relapse).                                                                                  | New       |
| 25                       | Clozapine toxicity                                | Use of clozapine;<br>Concurrent illness;<br>No full blood count/ white blood count/ neutrophils/ eosinophils in > 1 month prior to admission.                                                         | New       |
| <b>Endocrine</b>         |                                                   |                                                                                                                                                                                                       |           |
| 26                       | Hypoglycaemia                                     | Use of insulin; OR<br>Use of long-acting sulfonylurea in the 3 months prior to admission; AND<br>Inadequate blood glucose monitoring OR reduced adherence to diabetes treatment plan.                 | Original* |
| 27                       | Diabetic complications (including hyperglycaemia) | Previously diagnosed with diabetes;<br>Use of a hypoglycaemic in the 6 months prior to admission; AND<br>No HbA1c in previous 6 months.                                                               | Original* |
| 28                       | Hypothyroidism or thyrotoxicosis                  | Use of amiodarone or lithium;<br>No thyroid function test in the 6 months prior to admission.                                                                                                         | Original* |
| <b>Fracture or falls</b> |                                                   |                                                                                                                                                                                                       |           |

|                     |                                                |                                                                                                                                                                                                                                                                                                                                                                            |           |
|---------------------|------------------------------------------------|----------------------------------------------------------------------------------------------------------------------------------------------------------------------------------------------------------------------------------------------------------------------------------------------------------------------------------------------------------------------------|-----------|
| 29                  | Hip fracture or other fracture/break           | Aged 65 years or older; AND<br>Use of long-term corticosteroids (> 1 month); AND/OR<br>Use of sedating psychotropic medication (including TCAs, benzodiazepines, antipsychotics, opioids); AND/OR<br>Use of cardiovascular drugs with high potential to cause postural hypotension (including nitrates, centrally acting adrenergic blockers and alpha-receptor blockers). | Original* |
| 30                  | Hip fracture                                   | Female gender;<br>Prior fall from the standing level resulting in fracture;<br>No use of HRT, bisphosphonate or other osteoporosis medicine in the 6 months prior to admission.                                                                                                                                                                                            | Original  |
| 31                  | Hip fracture                                   | Male gender;<br>Prior fall from the standing level resulting in fracture;<br>No use of bisphosphonate or other osteoporosis medicine in the 6 months prior to admission.                                                                                                                                                                                                   | Original  |
| 32                  | Low-trauma fracture                            | Previous low-trauma fracture;<br>Not taking osteoporosis prevention therapy at time of admission.                                                                                                                                                                                                                                                                          | New       |
| <b>Neurological</b> |                                                |                                                                                                                                                                                                                                                                                                                                                                            |           |
| 33                  | Acute confusion                                | Urinary tract infection un/inadequately treated                                                                                                                                                                                                                                                                                                                            | New       |
| 34                  | Acute confusion                                | Use of two or more anticholinergic agents at the time of admission; OR<br>Use of a highly anticholinergic agent at the time of admission; OR<br>Use of two or more of sedating prescription drugs and/or sedating antihistamines; OR<br>Use of multiple psychotropic medicines ( $\geq 3$ unique medicines from ATC groups, N05 or N06) at the time of admission.          | Original* |
| 35                  | Seizure                                        | Use of an anticonvulsant;<br>Concurrent use of a medication which lowers the seizure threshold [as specified in the Australian Medicines Handbook]; AND/OR<br>Reduced compliance with anticonvulsant medication.                                                                                                                                                           | Original* |
| 36                  | Bipolar disorder                               | Prior hospitalisation for bipolar disorder;<br>Use of lithium;<br>No lithium drug level in the 3 months prior to admission.                                                                                                                                                                                                                                                | Original  |
| 37                  | Bipolar affective disorder/ psychotic disorder | Prior hospitalisation for bipolar disorder;<br>No use of/ poor compliance with a mood stabiliser; OR<br>Reduced compliance with long acting injection and/or oral medication.                                                                                                                                                                                              | New       |

|                    |                                         |                                                                                                                                                                                                                                         |           |
|--------------------|-----------------------------------------|-----------------------------------------------------------------------------------------------------------------------------------------------------------------------------------------------------------------------------------------|-----------|
| 38                 | Depression                              | Prior diagnosis of depression;<br>Concurrent use of a moderately highly lipophilic beta blocker.                                                                                                                                        | Original  |
| 39                 | Depression [readmission]                | Reduced compliance with antidepressant or augmenting medications (mood stabiliser or antipsychotic); AND/OR<br>No review (including medication adherence) undertaken post previous admission.                                           | New       |
| 40                 | Mania/hypomania                         | Use of antidepressants in the two months prior to admission;<br>No use of mood stabiliser in the two months prior to admission.                                                                                                         | New       |
| 41                 | Attempted suicide                       | Use of SSRI in adolescents (up to 20 years old);<br>No psychiatric review in 12 months prior to admission.                                                                                                                              | New       |
| 42                 | Psychotic episode                       | History of psychosis/ mental illness;<br>Reduced compliance with prescribed antipsychotic/ anxiolytic medication.                                                                                                                       | New       |
| 43                 | Antidepressant withdrawal symptoms      | Abrupt cessation of antidepressant (especially short-acting such as paroxetine and venlafaxine).                                                                                                                                        | New       |
| 44                 | Acute anxiety                           | Cessation of psychotropic medications (such as antidepressant and/or benzodiazepines) without monitoring.                                                                                                                               | New       |
| 45                 | Eating disorder / electrolyte imbalance | Excessive laxative use; OR<br>Use/abuse of medications altering electrolyte levels (for example, loop diuretics).                                                                                                                       | New       |
| 46                 | Serotonin toxicity                      | Use of multiple serotonergic agents that may contribute to serotonin toxicity (desvenlafaxine, duloxetine, MAOIs including moclobemide, SSRIs, TCAs, venlafaxine, fentanyl, tramadol, selegiline, lithium, tryptophan, St John's Wort). | New       |
| <b>Renal</b>       |                                         |                                                                                                                                                                                                                                         |           |
| 47                 | Renal failure                           | Use of ACEI or ARB;<br>No BUN or serum creatinine test in the 12 months prior to admission.                                                                                                                                             | Original* |
| 48                 | Renal failure                           | Use of allopurinol;<br>No BUN or serum creatinine test in the 6 months prior to admission.                                                                                                                                              | Original  |
| 49                 | Renal failure                           | Use of lithium;<br>No BUN or serum creatinine test in the 3 months prior to admission.                                                                                                                                                  | Original  |
| 50                 | Renal failure                           | NSAID use for >3 months;<br>BUN or serum creatinine not monitored in the previous 12 months.                                                                                                                                            | New       |
| 51                 | Renal failure                           | Use of methotrexate;<br>No BUN or serum creatinine test in the 6 months prior to admission.                                                                                                                                             | New       |
| <b>Respiratory</b> |                                         |                                                                                                                                                                                                                                         |           |
| 52                 | Asthma AND/OR COPD                      | Prior hospitalisation for/or diagnosis of asthma/COPD; AND<br>No / inadequate maintenance therapy (LAMA, LABA, ICS); OR                                                                                                                 | Original* |

|                                      |                                              |                                                                                                                                                           |           |
|--------------------------------------|----------------------------------------------|-----------------------------------------------------------------------------------------------------------------------------------------------------------|-----------|
|                                      |                                              | Poor inhaler technique; AND/OR                                                                                                                            |           |
|                                      |                                              | No action plan in place; AND/OR                                                                                                                           |           |
|                                      |                                              | No smoking cessation advice given.                                                                                                                        |           |
| 53                                   | Asthma/COPD                                  | Prior hospitalisation for/or diagnosis of asthma and/or COPD;                                                                                             | Original  |
|                                      |                                              | Use of beta-blocker eye drops for glaucoma at the time of admission.                                                                                      |           |
| 54                                   | Chronic obstructive pulmonary disease (COPD) | Prior hospitalisation for/or diagnosis of COPD;                                                                                                           | Original  |
|                                      |                                              | Use of a betablocker at the time of admission.                                                                                                            |           |
| 55                                   | Acute respiratory failure                    | Prior hospitalisation for/or diagnosis of COPD;                                                                                                           | Original  |
|                                      |                                              | Use of a medium to long-acting benzodiazepine at the time of admission.                                                                                   |           |
| 56                                   | Asthma                                       | Prior hospitalization for/or diagnosis of asthma/COPD;                                                                                                    | New       |
|                                      |                                              | High use (>2X per week) of a short-acting bronchodilator (SABA, SAMA);                                                                                    |           |
|                                      |                                              | No use of maintenance therapy (LAMA, LABA, ICS).                                                                                                          |           |
| 57                                   | Bronchiectasis                               | Two or more admissions with bronchiectasis exacerbations in last 12 months;<br>No prophylactic azithromycin trialled in the 12 months prior to admission. | New       |
| <b>Genitourinary</b>                 |                                              |                                                                                                                                                           |           |
| 58                                   | Urinary retention                            | Prior diagnosis of benign prostatic hyperplasia OR bladder atony due to diabetes mellitus;                                                                | Original* |
|                                      |                                              | Current use of a drug with anticholinergic effects or an opioid at the time of admission.                                                                 |           |
| 59                                   | Recurrent urinary tract infection            | No test for organism identification and sensitivity undertaken.                                                                                           | New       |
| <b>Sexually Transmitted Diseases</b> |                                              |                                                                                                                                                           |           |
| 60                                   | Chlamydia or gonorrhoea                      | Untreated with antibiotics for more than 1 week after results received.                                                                                   | New       |
| <b>Vaccine Preventable Diseases</b>  |                                              |                                                                                                                                                           |           |
| 61                                   | Pneumonia                                    | No pneumococcal vaccine if 'at risk' (chronic illness or >50 years);<br>No revaccination after 5 years.                                                   | New       |
| 62                                   | Influenza                                    | No influenza vaccination in the past 12 months.                                                                                                           | New       |
| 63                                   | Tetanus                                      | No/incomplete vaccination.                                                                                                                                | New       |
| 64                                   | Diphtheria                                   | No/incomplete vaccination.                                                                                                                                | New       |
| 65                                   | Whooping cough                               | No/incomplete vaccination.                                                                                                                                | New       |
| 66                                   | Acute poliomyelitis                          | No/incomplete vaccination.                                                                                                                                | New       |
| 67                                   | Varicella                                    | No/incomplete vaccination.                                                                                                                                | New       |
| 68                                   | Measles                                      | No/incomplete vaccination.                                                                                                                                | New       |

|              |                                                                   |                                                                                                                                                                                                                                                                                                   |     |
|--------------|-------------------------------------------------------------------|---------------------------------------------------------------------------------------------------------------------------------------------------------------------------------------------------------------------------------------------------------------------------------------------------|-----|
| 69           | Rubella                                                           | No/incomplete vaccination.                                                                                                                                                                                                                                                                        | New |
| 70           | Mumps                                                             | No/incomplete vaccination.                                                                                                                                                                                                                                                                        | New |
| 71           | Hepatitis A                                                       | No/incomplete vaccination.                                                                                                                                                                                                                                                                        | New |
| 72           | Hepatitis B                                                       | No/incomplete vaccination.                                                                                                                                                                                                                                                                        | New |
| <b>Other</b> |                                                                   |                                                                                                                                                                                                                                                                                                   |     |
| 73           | Cellulitis                                                        | No treatment / inadequate treatment with antibiotics to treat staphylococcus aureus or streptococcus pyogenes with an appropriate antibiotic at time of admission.                                                                                                                                | New |
| 74           | Rheumatic fever (<21 years of age)                                | Prior diagnosis of rheumatic fever or rheumatic heart disease;<br>No benzathine penicillin (or erythromycin if allergic) in the last 28 days.                                                                                                                                                     | New |
| 75           | Gout attack                                                       | Previous history of gout;<br>Use of loop diuretics or thiazide diuretics.                                                                                                                                                                                                                         | New |
| 76           | Hepatitis C                                                       | No treatment with direct acting antivirals.                                                                                                                                                                                                                                                       | New |
| 77           | Methicillin resistant Staphylococcus aureus (MRSA) skin infection | Recurrent skin infection (>2 weeks);<br>Continuing use of $\beta$ -lactam antibiotic;<br>No skin swab taken.                                                                                                                                                                                      | New |
| 78           | Jaw osteonecrosis                                                 | Use of a bisphosphonate or denosumab;<br>No dental assessment within 6 months prior to admission.                                                                                                                                                                                                 | New |
| 79           | Trachoma                                                          | Untreated with appropriate antibiotics.                                                                                                                                                                                                                                                           | New |
| 80           | Iron deficiency anaemia                                           | Confirmed pregnancy;<br>No FBE test during pregnancy.                                                                                                                                                                                                                                             | New |
| 81           | Eclampsia                                                         | Prior diagnosis of hypertension (a systolic blood pressure of greater than or equal to 160mm Hg or a diastolic blood pressure greater than or equal to 110 mm Hg) during the current pregnancy;<br>No treatment with antihypertensive agent (suitable for use in pregnancy) at time of admission. | New |

\* The original indicator (from Kalish 2012<sup>11</sup>) forms the basis of this indicator but it has been modified either to (i) update the indicator to reflect current guidelines or new medicines in the class; (ii) combine with another indicator/s for simplification; or (iii) has been split into more indicators for clarity.

DOAC = Direct oral anticoagulant; NSAID = non-steroidal anti-inflammatory; LMWH = low molecular weight heparin; GI = gastrointestinal; CHF = congestive heart failure; COX-2 = cyclooxygenase-2; ACEI = angiotensin-converting enzyme inhibitors; ARB = angiotensin II blockers; ARNi = angiotensin receptor-neprilysin inhibitors; MI = myocardial infarction; HMG-CoA = 3-hydroxy-3-methylglutaryl-CoA; CHA2Ds2Vasc = Congestive heart failure, Hypertension, Age, Diabetes, and Stroke/TIA Vascular disease (peripheral arterial disease, previous MI, aortic atheroma) [female gender is also included in this scoring system]; CVD = cardiovascular disease; TIA = transient ischaemic attack; TCA = tricyclic antidepressants; SIADH = syndrome of inappropriate antidiuretic hormone secretion; ECG = electrocardiogram; CRP = C-reactive protein; HbA1c = glycolated haemoglobin; HRT = hormone replacement therapy; ATC = anatomical therapeutic chemical; SSRI = selective serotonin reuptake inhibitor; MAOI = monoamine oxidase inhibitor; BUN = blood urea nitrogen; COPD = chronic obstructive pulmonary disease; LAMA = long-acting muscarinic antagonists; LABA =



1  
2  
3 long-acting beta agonists; ICS = inhaled corticosteroids; SABA = short-acting beta-2 agonists; SAMA = short-acting muscarinic antagonist; MRSA = methicillin resistant  
4 Staphylococcus aureus; FBE = full blood examination; Hg = mercury.  
5 # The final list of clinical indicators has not been considered as part of any independent Health Technology Assessment (HTA) for effectiveness/cost-effectiveness.  
6  
7  
8  
9  
10  
11  
12  
13  
14  
15  
16  
17  
18  
19  
20  
21  
22  
23  
24  
25  
26  
27  
28  
29  
30  
31  
32  
33  
34  
35  
36  
37  
38  
39  
40  
41  
42  
43  
44  
45  
46

For peer review only

## Discussion

The development of this updated clinical indicator list is an important step in addressing MRPs for Indigenous Australians. This study builds on earlier work which identified a set of clinical indicators for use in a general Australian population.[13, 14] The new list includes 81 indicators, sourced from 34 of the original 45 indicators and 47 newly identified indicators. In comparison to the general Australian population list, the new list contains more neurological indicators (expanded from 7 to 14), vaccine preventable diseases (expanded from 0 to 12) and “other” indicators (expanded from 0 to 9), which better reflects the health burden of the Indigenous population. For example, trachoma and rheumatic heart disease are health issues seen in the Indigenous population, but rarely in the general Australian population.

Panellists included specialist and general practice doctors, pharmacists, epidemiologists and researchers, the majority of whom had extensive experience in providing healthcare for Indigenous populations. The purpose of conducting this research was two-fold: firstly to provide a prespecified list of PPMRHs to define the primary outcome measure for the IMeRSe feasibility study;[15] and as a resource for pharmacists conducting medication reviews for Indigenous Australians to assist in identifying sub-optimal processes of primary care related to medication use, defined for the IMeRSe feasibility study as serious MRPs.[15]

AHSs offer Indigenous Australians access to holistic and person-centred primary care. The inclusion of pharmacists undertaking medication review services is important as much of the health burden experienced by Indigenous Australians results from chronic conditions such as renal and/or cardiovascular disease, type-II diabetes and mental illness, which in turn increases the requirement for ongoing medication regimens.[1, 30] There are reports that the levels of MRPs amongst Indigenous populations are of concern,[31, 32] although there is scant evidence of the size or extent of the problem. Further, Indigenous populations access

1  
2  
3 the existing government funded medication review services<sup>2</sup> at a lower rate than non-  
4  
5 Indigenous Australian for reasons including the lack of culturally responsive services, not  
6  
7 having established and trusting relationships with pharmacists and because pharmacists are  
8  
9 not usually integrated into AHSs.16, 17]

10  
11  
12  
13 The clinical indicator list developed in this study will be tested for predictive validity in two  
14  
15 ways through the IMeRSe feasibility study: (i) as a primary outcome measure and as such,  
16  
17 will be used to classify a set of serious MRPs which can be analysed against a list of all  
18  
19 MRPs (regardless of severity); and (ii) to estimate the rate of PPMRHs in Indigenous  
20  
21 populations using a linked administrative data-set comprised of five years of hospital  
22  
23 admissions from the state of Queensland, Australia. This data set will be combined with  
24  
25 pharmaceutical and medical services usage for the same cohort of hospitalised individuals  
26  
27 (collected by the national government). Thus, the background rate of PPMRHs can be  
28  
29 identified, for arguably the most representative state in Australia in terms of Indigenous  
30  
31 Australians, as urban, rural and remote populations are all included. However, it is  
32  
33 anticipated that it will not be possible to measure some of the indicators using these existing  
34  
35 administrative databases as insufficient clinical information (such as cardiovascular disease  
36  
37 risk) will be available. It is possible that this problem may decline over time as individual  
38  
39 health records become fully digitalised and shared in Australia.  
40  
41  
42  
43  
44  
45

46 The processes contributing to sub-optimal clinical care specified in the final indicator list  
47  
48 (Table 3) are termed serious MRPs; these may, or may not, result in a hospitalisation. Only  
49  
50 when a hospitalisation does occur is a PPMRH realised. Thus, we are interested not only in  
51  
52 the rate of PPMRHs in the Indigenous population, but also the rate of MRPs and the  
53  
54

---

55  
56 <sup>2</sup> The MedsCheck and Diabetes MedsCheck Programme provides for in-pharmacy reviews of consumers who are taking multiple  
57  
58 medications and/or have newly diagnosed or poorly controlled type 2 diabetes. These reviews are aimed at enhancing the quality use of  
59  
60 medicines and reducing the number of adverse drug events experienced by consumers. A Home Medicines Review (HMR) is designed to  
enhance the quality use of medicines and reduce the number of adverse medicine events by assisting consumers to better manage and  
understand their medicines through a medication review conducted by an accredited pharmacist in the patient's home  
(<http://www.6cpa.com.au/medication-management-programs>).

1  
2  
3 translation rate of MRPs to PPMRHs. The reduction in MRPs of all severity, including  
4  
5 serious MRPs, is a key outcome of IMerSe feasibility study.  
6  
7

8 A modified Delphi technique was used in this study to reach consensus between experts. The  
9  
10 Delphi technique allows for anonymity in responses, which permits all panellists an equal  
11  
12 chance to have their opinion considered. A majority consensus was reached for 65 (80%) of  
13  
14 the total number of indicators at the end of Round 2 rating. Of the remaining indicators  
15  
16 (N=23), the majority required only a short discussion and/or brief changes to wording to  
17  
18 reach consensus Round 3 rating. The researchers considered that this meeting expediated  
19  
20 consensus on the remaining indicators and was a strength of the study. It must be noted that  
21  
22 use of the term “consensus” here, especially in the early phases of the Delphi process, is in  
23  
24 fact “convergence” of expert opinion. However, consensus has been assumed because : (i)  
25  
26 panellists were made aware that they were involved in a decision-making process at the start;  
27  
28 (ii) justification for non-acceptance was fed-back to the group between rounds; and (iii) face-  
29  
30 to-face discussions were held to reach agreement in Round 3.  
31  
32  
33  
34  
35

36 Unlike the RAND appropriateness method, the modified Delphi rating process did not  
37  
38 incorporate a formal mechanism for considering the strength of evidence of the proposed  
39  
40 indicators. This aspect could not be incorporated into the present study, due to the lack of  
41  
42 relevant research specifically involving Indigenous Australians, and hence the lack of  
43  
44 evidence for this specific patient population. However, the existing indicator list, which was  
45  
46 adapted for the present study was developed using the RAND appropriateness measure,[13]  
47  
48 and considered the strength of evidence underpinning each indicator during the indicator  
49  
50 development process. Thirty-four of the indicators accepted in the present study were based  
51  
52 on existing indicators, so nearly half of the indicators were developed by explicitly  
53  
54 considering the strength of evidence for the particular indicator. During the moderated online  
55  
56 and face-to-face discussions, the researchers observed that clinicians incorporated current  
57  
58  
59  
60

1  
2  
3 clinical guidelines into their decision-making processes, although this was not undertaken in  
4 a formal way. This could be viewed as a potential limitation of the study. Another possible  
5 limitation was the relatively small number of panellists who agreed to participate, which  
6 could be due to workload pressures for clinicians working in Indigenous health in Australia.  
7  
8 Finally, the authors note that the final list of clinical indicators developed here are not  
9 necessarily independent of each other, nor are they of equal weighting of clinical seriousness.  
10  
11 Thus, this issue will need to be accounted for in the data analysis of the PPMRHs for the  
12  
13 IMeRSe study.  
14  
15  
16  
17  
18  
19  
20  
21

22 By classifying a list of serious MRPs, the importance of other MRPs may be discounted. The  
23 lack of adherence to medication regimens amongst Indigenous populations is of particular  
24 concern, especially given the high rates of chronic disease such as diabetes, cardiovascular  
25 disease, severe mental illness and renal disease that require regular medication. Barriers that  
26 limit adherence including poor health literacy, lack of access to medications (cost and  
27 physical access) and medication sharing with relatives and friends can all negatively impact  
28 on health through uncontrolled illness.[31] In the short term, health decrements due to low  
29 medication adherence may not result in hospitalisation, it may nonetheless contribute to life-  
30 threatening outcomes in the medium to longer term. It must be stressed that the final clinical  
31 indicator list developed here should only be used by pharmacists and other health  
32 professionals undertaking medication review services as a resource to optimise medication  
33 management. It does not provide a definitive list of the most serious problems, nor does it  
34 replace clinical judgement.  
35  
36  
37  
38  
39  
40  
41  
42  
43  
44  
45  
46  
47  
48  
49  
50  
51  
52  
53  
54  
55

## 56 **Conclusions**

57  
58  
59  
60

1  
2  
3 The final list of clinical indicators developed in this study represents an initial, but important,  
4 step in quantifying serious MRPs and PPMRHs in Indigenous Australian populations. Such a  
5 list is not static and should be regularly updated in light of changes to clinical guidelines and  
6 medicines formularies. The health of Indigenous Australians may be enhanced by using this  
7 list as a resource during the process of medication review to identify sub-optimal processes of  
8 care and then institute corrective processes to prevent a potential hospitalisation.  
9  
10  
11  
12  
13  
14  
15  
16  
17  
18  
19  
20  
21  
22

### 23 **Figure 1 Legend**

24 Figure 1: An example of the online presentation of a clinical indicator to panellists  
25  
26  
27  
28  
29  
30  
31  
32  
33  
34  
35  
36  
37  
38  
39  
40  
41  
42  
43  
44  
45  
46  
47  
48  
49  
50  
51  
52  
53  
54  
55  
56  
57  
58  
59  
60

1  
2  
3 **List of Abbreviations**  
4

5 AHS – Aboriginal health service  
6

7 CVG – clinical validation group  
8

9 IMeRSe - Indigenous Medication Review Service  
10

11 MRPs – medication-related problems  
12

13 PPMRHs – potentially preventable medication-related problems  
14  
15  
16  
17  
18  
19  
20  
21  
22  
23  
24  
25  
26  
27  
28  
29  
30  
31  
32  
33  
34  
35  
36  
37  
38  
39  
40  
41  
42  
43  
44  
45  
46  
47  
48  
49  
50  
51  
52  
53  
54  
55  
56  
57  
58  
59  
60

For peer review only

## References

1. Australian Government Department of Health. National Aboriginal and Torres Strait Islander Health Plan 2013–2023. 2013.
2. Freeman T, Edwards T, Baum F, Lawless A, Jolley G, Javanparast S, et al. Cultural respect strategies in Australian Aboriginal primary health care services: beyond education and training of practitioners. *Aust N Z J Public Health*. 2014;38(4):355-61.
3. Griese-Mammen N, Hersberger KE, Messerli M, Leikola S, Horvat N, van Mil JWF, et al. PCNE definition of medication review: reaching agreement. *Int J Clin Pharm*. 2018;40(5):1199-208.
4. Jokanovic N, Tan EC, van den Bosch D, Kirkpatrick CM, Dooley MJ, Bell JS. Clinical medication review in Australia: a systematic review. *Res Social Adm Pharm*. 2016;12(3):384-418.
5. van Mil JF, Westerlund LT, Hersberger KE, Schaefer MA. Drug-related problem classification systems. *Ann Pharmacother*. 2004;38(5):859-67.
6. Eichenberger PM, Lampert ML, Kahmann IV, van Mil JF, Hersberger KE. Classification of drug-related problems with new prescriptions using a modified PCNE classification system. *Pharm World Sci*. 2010;32(3):362-72.
7. Peterson G, Tenni P. Identifying, prioritising and documenting drug-related problems. *Aust Pharm*. 2004;23(10):23-9.
8. Roughead EE, Gilbert AL, Sansom LN, Primrose JG. Drug-related hospital admissions: a review of Australian studies published 1988-1996. *Med J Aust*. 1998;168(8):405-8.
9. Robertson H, MacKinnon N. Development of a list of consensus-approved clinical indicators of preventable drug-related morbidity in older adults. *Clin Ther*. 2002;24:1595-613.
10. Sauer B, Hepler C, Cherney B, et al. Computerised indicators of potential drug-related emergency department and hospital admissions. *Am J Manag Care*. 2007; 13:29-35.
11. MacKinnon N, Hepler C. Preventable drug-related mortality in older adults. 1. Indicator development. *J Manag Care Pharm*. 2002;8:365-71.
12. Morris C, Cantroll J, Hepler C, et al. Preventing drug-related morbidity – determining valid indicators. *Int J Qual Health Care*. 2002;14:183-198.
13. Caughey GE, Kalisch Ellett LM, Wong TY. Development of evidence-based Australian medication-related indicators of potentially preventable hospitalisations: a modified RAND appropriateness method. *BMJ Open*. 2014;4(4):e004625.
14. Kalisch LM, Caughey GE, Barratt JD, Ramsay EN, Killer G, Gilbert AL, et al. Prevalence of preventable medication-related hospitalizations in Australia: an opportunity to reduce harm. *Int J Qual Health Care*. 2012;24(3):239-49.
15. Wheeler AJ, Spinks J, Kelly F, Ware RS, Vowles E, Stephens M, et al. Protocol for a feasibility study of an Indigenous Medication Review Service (IMeRS) in Australia. *BMJ Open*. 2018;8(11):e026462.
16. Swain L, Barclay L. Medication reviews are useful, but the model needs to be changed: perspectives of Aboriginal Health Service health professionals on home medicines reviews. *BMC Health Services*. 2015;15:366.
17. Swain L, Barclay L. Exploration of Aboriginal and Torres Strait Islander perspectives on home medicines review. *Rural Remote Health*. 2015;15:3009.
18. Campbell S, Braspenning J, Hutchinson A, Marshall M. Research methods used in developing and applying quality indicators in primary care. *Qual Saf Health Care*. 2002;11(4):358-64.
19. Murphy M. Consensus development methods, and their use in clinical guideline development. *Health Technol Assess*. 1998;2(3):1-88.
20. Hutchinson A, Fowler P. Outcome measures for primary health care: what are the research priorities? *Br J Gen Pract*. 1992;42(359):227-31.
21. Boukdedid R, Abdoul H, Loustau M, Sibony O, Alberti C. Using and reporting the Delphi method for selecting healthcare quality indicators: a systematic review. *PLoS One*. 2011;6(6):e20476.
22. Delbecq AL, Van de Ven AH, Gustafson DH. Group techniques for program planning: A guide to nominal group and Delphi processes: Scott, Foresman Glenview, IL; 1975.



- 1
- 2
- 3
- 4 23. Brook RH, Chassin MR, Fink A, Solomon DH, Kosecoff J, Park RE. A method for the detailed
- 5 assessment of the appropriateness of medical technologies. *Int J Technol Assess Health Care.*
- 6 1986;2(1):53-63.
- 7 24. Shekelle P, Kahan J, Park R, Bernstein S. Assessing appropriateness by expert panels: how
- 8 reliable? *J Gen Intern Med.* 1995;10:81-.
- 9 25. Shekelle PG, Kahan JP, Bernstein SJ, Leape LL, Kamberg CJ, Park RE. The reproducibility of a
- 10 method to identify the overuse and underuse of medical procedures. *N Engl J Med.*
- 11 1998;338(26):1888-95.
- 12 26. Jones J, Hunter D. Consensus methods for medical and health services research. *BMJ: British*
- 13 *Medical Journal.* 1995;311(7001):376.
- 14 27. Hepler CD, Strand LM. Opportunities and responsibilities in pharmaceutical care. *Am J Hosp*
- 15 *Pharm.* 1990;47(3):533-43.
- 16 28. Limesurvey G. Limesurvey: An open source survey tool. In: Limesurvey GmbH H, Germany,
- 17 editor.
- 18 29. Tolsgaard MG, Todsén T, Sorensen JL, Ringsted C, Lorentzen T, Ottesen B, et al. International
- 19 multispecialty consensus on how to evaluate ultrasound competence: a Delphi consensus survey.
- 20 *PLoS One.* 2013;8(2):e57687.
- 21 30. Australian Government Department of Health. Aboriginal and Torres Strait Islander People
- 22 with a mental health condition. Canberra, Australia: Australian Bureau of Statistics; 2015.
- 23 31. Hamrosi K, Taylor S, Aslani P. Issues with prescribed medications in Aboriginal communities:
- 24 Aboriginal health workers' perspectives. *Rural Remote Health.* 2006;6(2):557.
- 25 32. Davidson PM, Abbott P, Davison J, DiGiacomo M. Improving medication uptake in Aboriginal
- 26 and Torres Strait Islander peoples. *Heart Lung Circ.* 2010;19(5-6):372-7.
- 27
- 28
- 29
- 30
- 31
- 32
- 33
- 34
- 35
- 36
- 37
- 38
- 39
- 40
- 41
- 42
- 43
- 44
- 45
- 46
- 47
- 48
- 49
- 50
- 51
- 52
- 53
- 54
- 55
- 56
- 57
- 58
- 59
- 60

1  
2  
3  
4  
5  
6  
7  
8  
9  
10  
11  
12  
13  
14  
15  
16  
17  
18  
19  
20  
21  
22  
23  
24  
25  
26  
27  
28  
29  
30  
31  
32  
33  
34  
35  
36  
37  
38  
39  
40  
41  
42  
43  
44  
45  
46  
47  
48  
49  
50  
51  
52  
53  
54  
55  
56  
57  
58  
59  
60

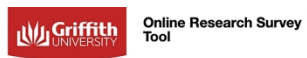

## Indigenous Medication Review Service - Clinical Validation Group

69%

**Haemorrhagic event**

**1. Haemorrhagic event (Original indicator set)**

- *Use of Warfarin*
- *Concurrent use of an interacting antibiotic*
- *No INR test in the 5 days prior to admission*

**Comments for consideration:**  
None so far

|               | Accept indicator unchanged | Reject indicator      | Specify alternative   | Not sure              |
|---------------|----------------------------|-----------------------|-----------------------|-----------------------|
| Please select | <input type="radio"/>      | <input type="radio"/> | <input type="radio"/> | <input type="radio"/> |

Figure 1: Example of online survey question

358x249mm (300 x 300 DPI)
